# Supplementary material for: Binary control of enzymatic cleavage of DNA origami by structural antideterminants
Source: PubMed Central journal article supplement — Nucleic Acids Res. 2017 Dec 4;46(2):995–1006. doi: 10.1093/nar/gkx1204 (PMC5778535; doi:10.1093/nar/gkx1204), 2017-12-04
Supplement: gkx1204_supp.pdf [file gkx1204_supp.pdf]

## Supplementary Information

### Binary Control of Enzymatic Cleavage of DNA Origami by Structural Antideterminants

Alex Stopar, Lucia Coral, Stefano Di Giacomo, Abimbola F. Adedeji, and Matteo Castronovo

#### Table of content

|                             |       |
|-----------------------------|-------|
| SI Figure 1 .....           | 2     |
| SI Figure 2 .....           | 3-4   |
| SI Figure 3 .....           | 5-6   |
| SI Figure 4 .....           | 7     |
| SI Figure 5 .....           | 8     |
| SI Figure 6 .....           | 9     |
| SI Figure 7 .....           | 10    |
| SI Figure 8 .....           | 11    |
| SI Figure 9 .....           | 12    |
| SI Figure 10 .....          | 13    |
| SI Figure 11 .....          | 14    |
| SI Figure 12 .....          | 15    |
| SI Figure 13 .....          | 16    |
| SI Figure 14 .....          | 17    |
| SI Figure 15 .....          | 18    |
| SI Figure 16 .....          | 19    |
| SI Figure 17 .....          | 20    |
| SI Figure 18 .....          | 21    |
| SI Figure 19 .....          | 22    |
| SI Figure 20 .....          | 23    |
| SI Figure 21 .....          | 24    |
| SI Figure 22 .....          | 25    |
| SI Figure 23 .....          | 26    |
| SI Table 1 .....            | 27    |
| SI Table 2 .....            | 28-30 |
| SI Table 3 .....            | 31    |
| List of DNA sequences ..... | 32-43 |
| Bibliography .....          | 43    |
| Acknowledgements .....      | 43    |

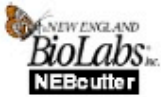

## Custom Digest

### Circular Sequence: M13mp18 - scaffold

Sequence digested with: AluI, BamHI, DraI, HaeIII, HhaI, HpyCH4IV, MspI, NlaIII, RsaI

| Cleavage code     | Enzyme name code                                                      |
|-------------------|-----------------------------------------------------------------------|
| ⌞   blunt end cut | Available from NEB                                                    |
| ⌞   5' extension  | Has other supplier                                                    |
| ⌞   3' extension  | Not commercially available                                            |
| ⌞   cuts 1 strand | *: cleavage affected by CpG methylation                               |
|                   | #: cleavage affected by other methylation (enz. name): ambiguous site |

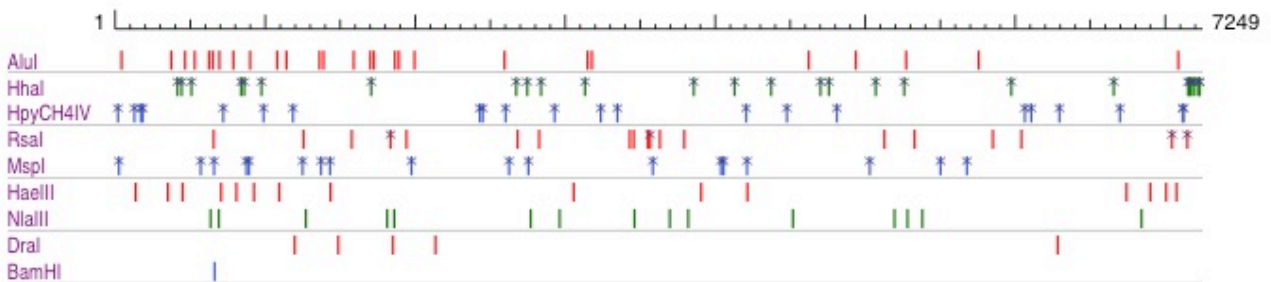

| # | Enzyme   | Specificity                         | Cuts |
|---|----------|-------------------------------------|------|
| 1 | AluI     | AG <sup>▼</sup> CT                  | 27   |
| 2 | BamHI    | G <sup>▼</sup> GATC <sup>▲</sup> _C | 1    |
| 3 | DraI     | TTT <sup>▼</sup> AAA                | 5    |
| 4 | HaeIII   | GG <sup>▼</sup> CC                  | 15   |
| 5 | HhaI     | G <sup>▼</sup> _CG <sup>▼</sup> _C  | 26   |
| 6 | HpyCH4IV | A <sup>▼</sup> _CG <sup>▼</sup> _T  | 22   |
| 7 | MspI     | C <sup>▼</sup> _CG <sup>▼</sup> _G  | 18   |
| 8 | NlaIII   | <sup>▼</sup> _CATG <sup>▼</sup>     | 15   |
| 9 | RsaI     | GT <sup>▼</sup> _AC                 | 19   |

**Supplementary Figure 1:** linear distribution and number of restriction sites for investigated restriction endonucleases in M13mp18 DNA sequence that is used as scaffold to form DNA origami. The table lists the selected restriction enzymes with the sites sequences recognised, and the total number of sites in the M13 DNA sequence. NlaIII and Hin1II share the restriction site as well as HaeIII and BsuRI (isoschizomers). The shown data were generated with NEBcutter V2.0 (online tool, <http://nc2.neb.com/NEBcutter2/>) by inputting the M13mp18 DNA sequence (see page 30 of the SI).

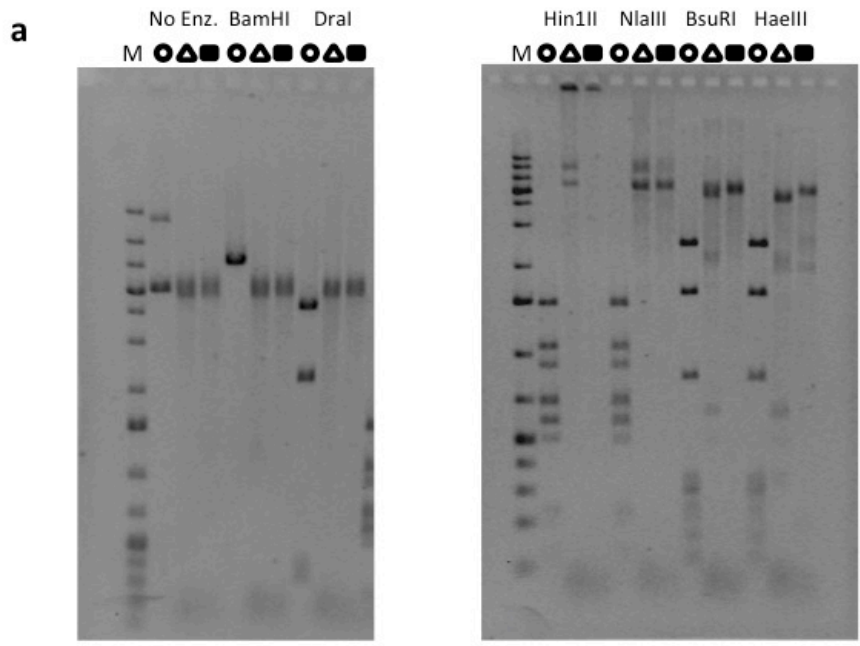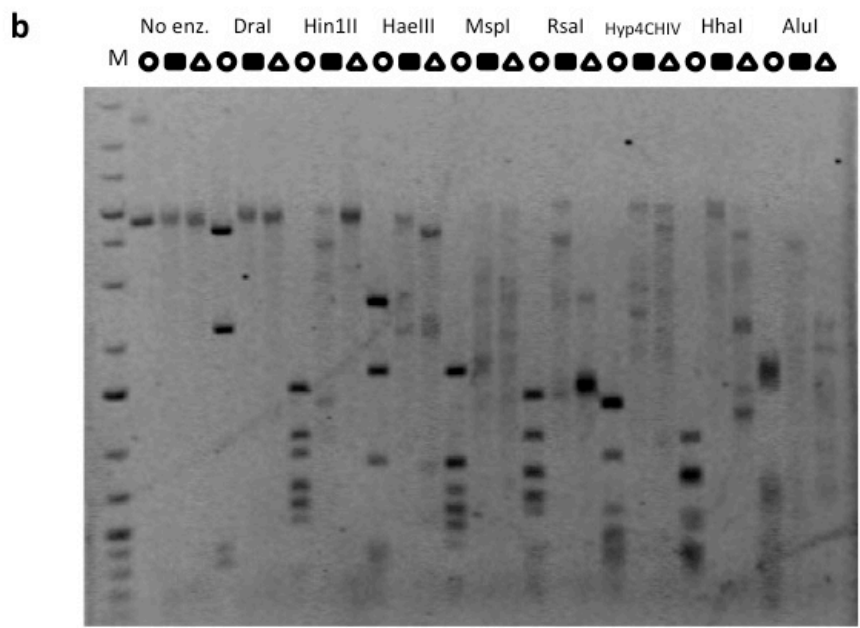

Legend: ● = M13mp18 dsDNA plasmid    ▲ = triangular DNA origami    ■ = rectangular DNA origami

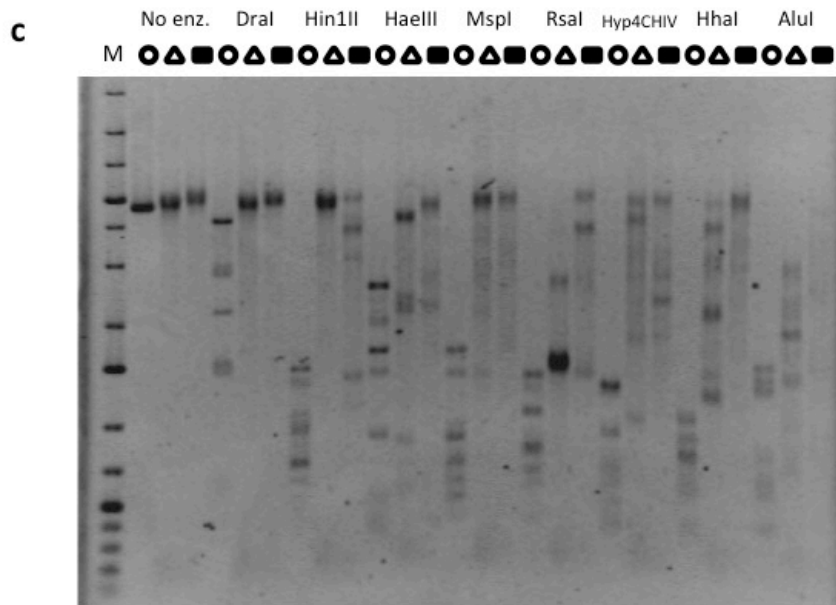

Legend: ● = M13mp18 dsDNA plasmid    ▲ = triangular DNA origami    ■ = rectangular DNA origami

**Supplementary Figure 2:** Repeats of the experiments showed in Fig. 1d (a-c) Photographs of 1% agarose gels that display digestion products of the action of restriction endonucleases on the sharp triangular DNA origami, rectangular DNA origami and M13 dsDNA plasmid. (a) DNA residuals are present in the gel wells for both nanostructures treated with Hin1II in “G” Buffer. In (b-c), for Hin1II we changed to Tango Buffer. The digestion efficiency can vary on restriction enzymes aging. M, 1 kb molecular weight marker.



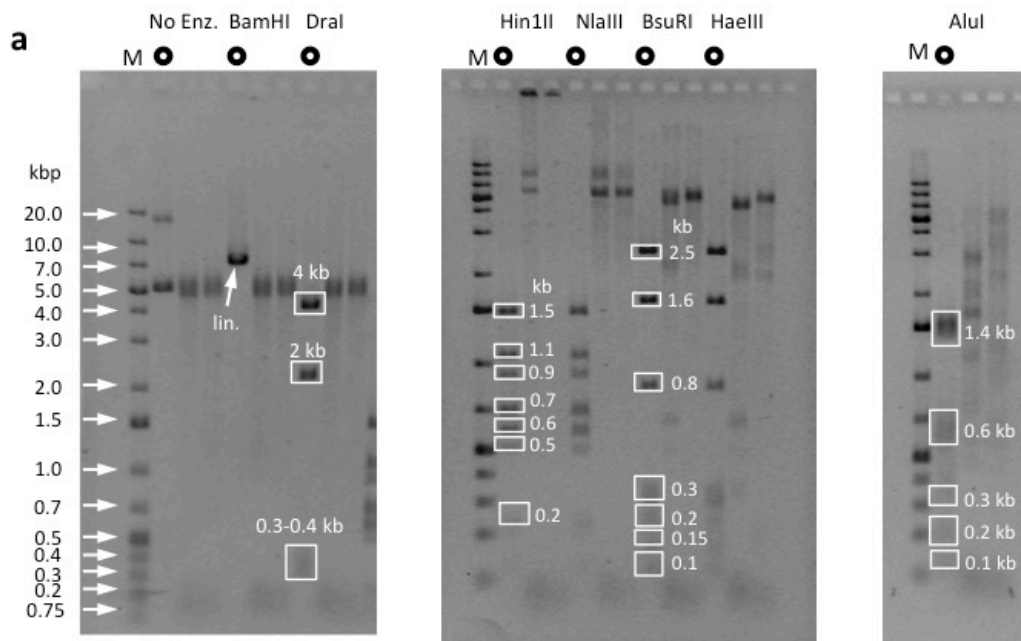

Legend: ● = M13mp18 dsDNA plasmid

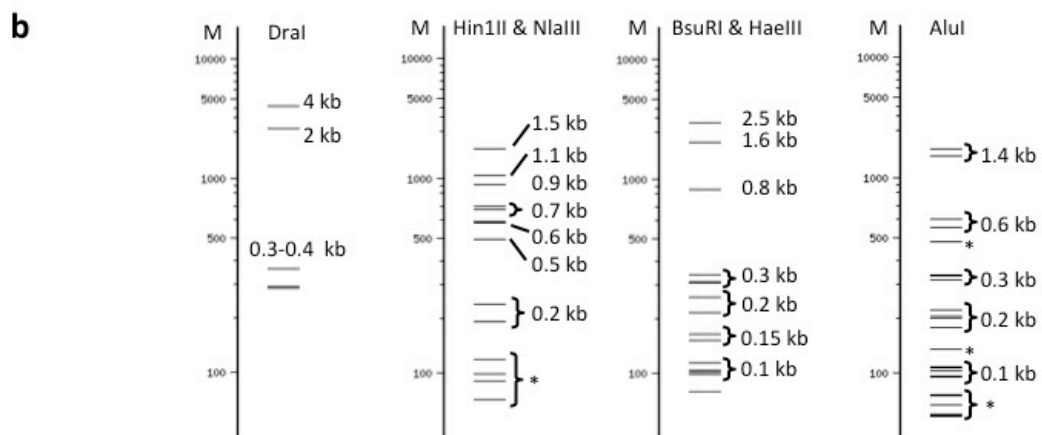

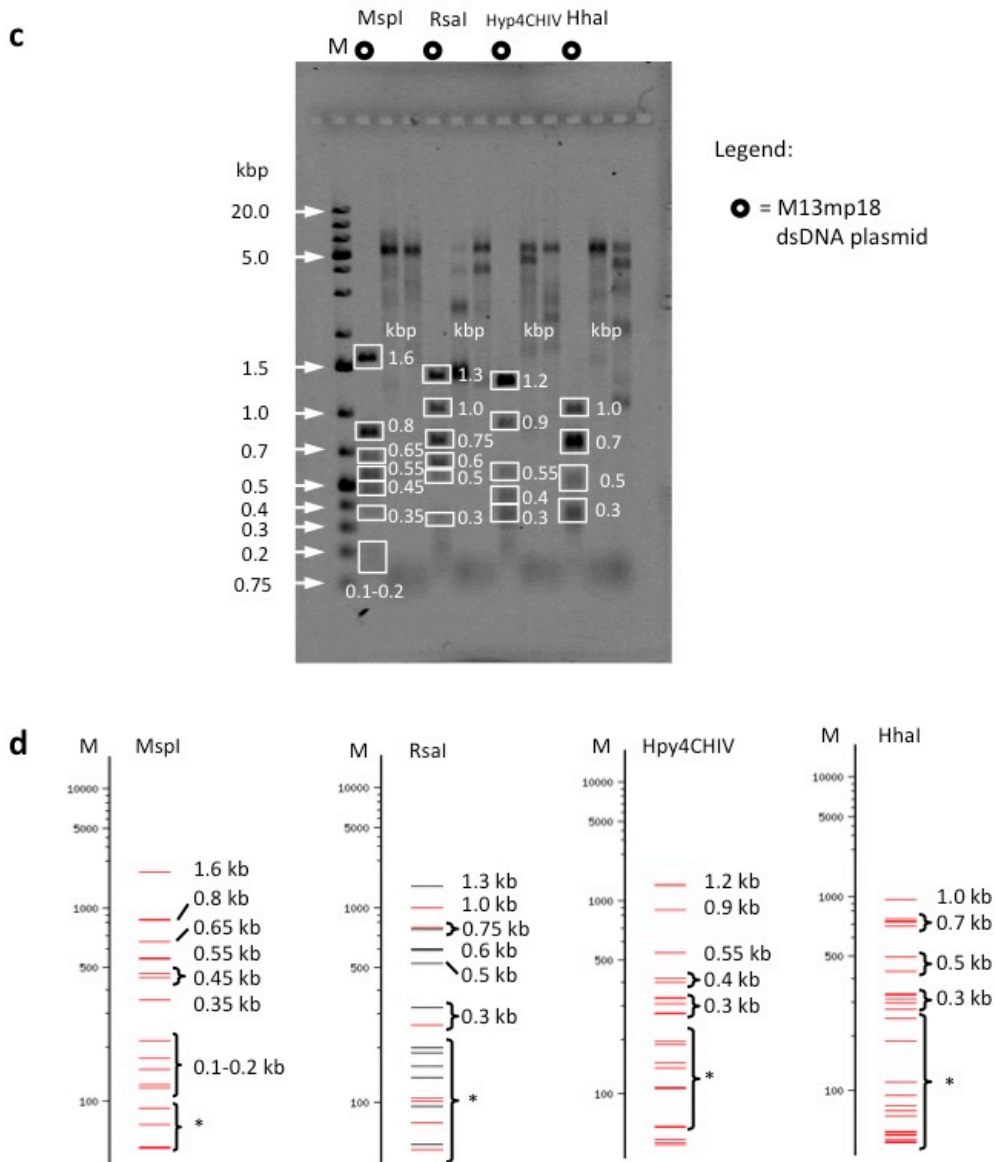

**Supplementary Figure 3:** Analysis of number and molecular weight (MW) of M13 dsDNA plasmid fragments produced by the action of REases. (a-c) Gel images from Supplementary Figure 2 and Fig. 1 were analysed, and each gel band corresponding to a M13 dsDNA fragment or group of fragments (with similar MW and migration distance) is highlighted (white box) and with an estimation of MW is provided. Isoschizomer REases (Hin1II and NlaIII; BsuRI and HaeIII) share the same restriction sites, and the analysis was performed for only one REase. (b-d) Diagrams representing virtual gels analysis of fragments produced by the complete action of each REase on the M13 dsDNA plasmid, as generated with NEBcutter V2.0 (<http://nc2.neb.com/NEBcutter2/>). Setting parameters for each REase: “Gel type” = 1% agarose; “L” (the length of the gel) = 90 mm; inputted DNA sequence = M13mp18 (see page 30 of the SI). Fragments with similar MWs are clustered as they cannot be accurately resolved with agarose gel electrophoresis. The good match between the predicted distributions of M13 fragments and the gels bands suggests that the M13 dsDNA plasmid was completely cut by all REases under investigation. \*, gel bands difficult to be recognised or that are not visible in experimental gel; M, 1 kb molecular weight marker; lin., linearised form of the M13 dsDNA.

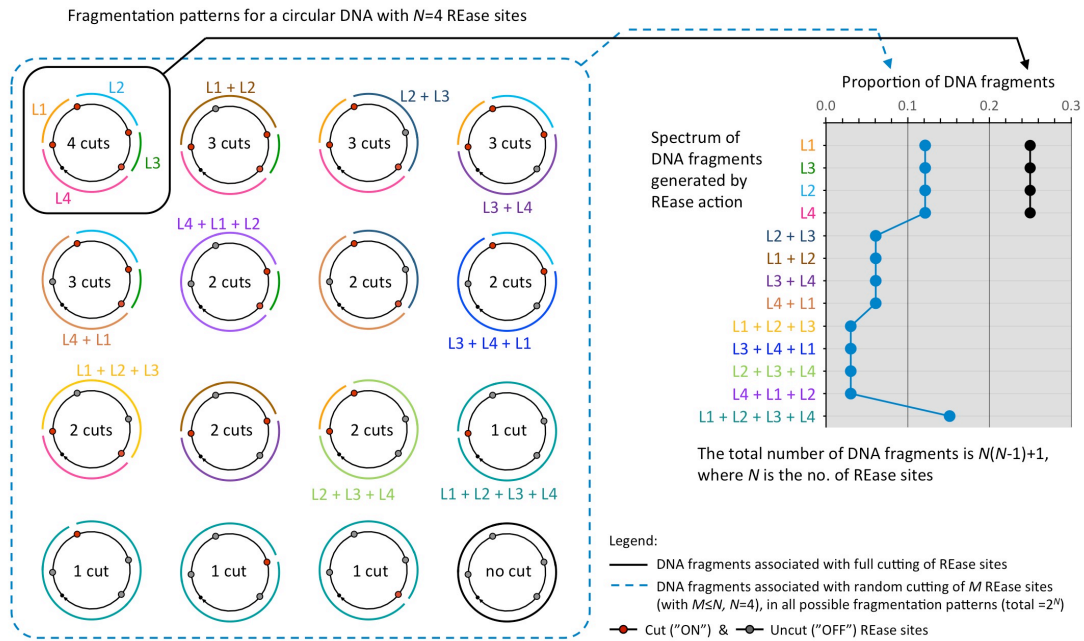

**Supplementary Figure 4:** (Left) diagrams depicting all the possible fragmentation patterns with which an REase cleaves 4 available sites within a circular DNA molecule (regardless it is unfolded or folded as scaffold within a DNA origami). In the case of a full cleavage (4 cuts), the circular DNA molecule is converted into  $N=4$  fragments (L1, L2, L3, and L4). For partial cleavage figures, max. 3 or less fragments can be generated ( $M$ , with  $M \leq N$ ). The total number of ways the REase can chose sites to cleave over the circular DNA is  $2^N$ , while the number of fragments with different sequence content (and therefore molecular weight) that can be generated in this way is  $N(N-1)+1$  (i.e. 13 for  $N=4$ ). (Right) Proportion of DNA fragments produced by the action of a REase either in the case of full cleavage (black) (i.e. with site reactivity = 100% for all sites), or partial cleavage (blue) (i.e. with site reactivity = 50% for all sites). In the first case, gel analysis of the products would lead to max. 4 gel bands, while in the second case, the max. number of gel bands would be 13.

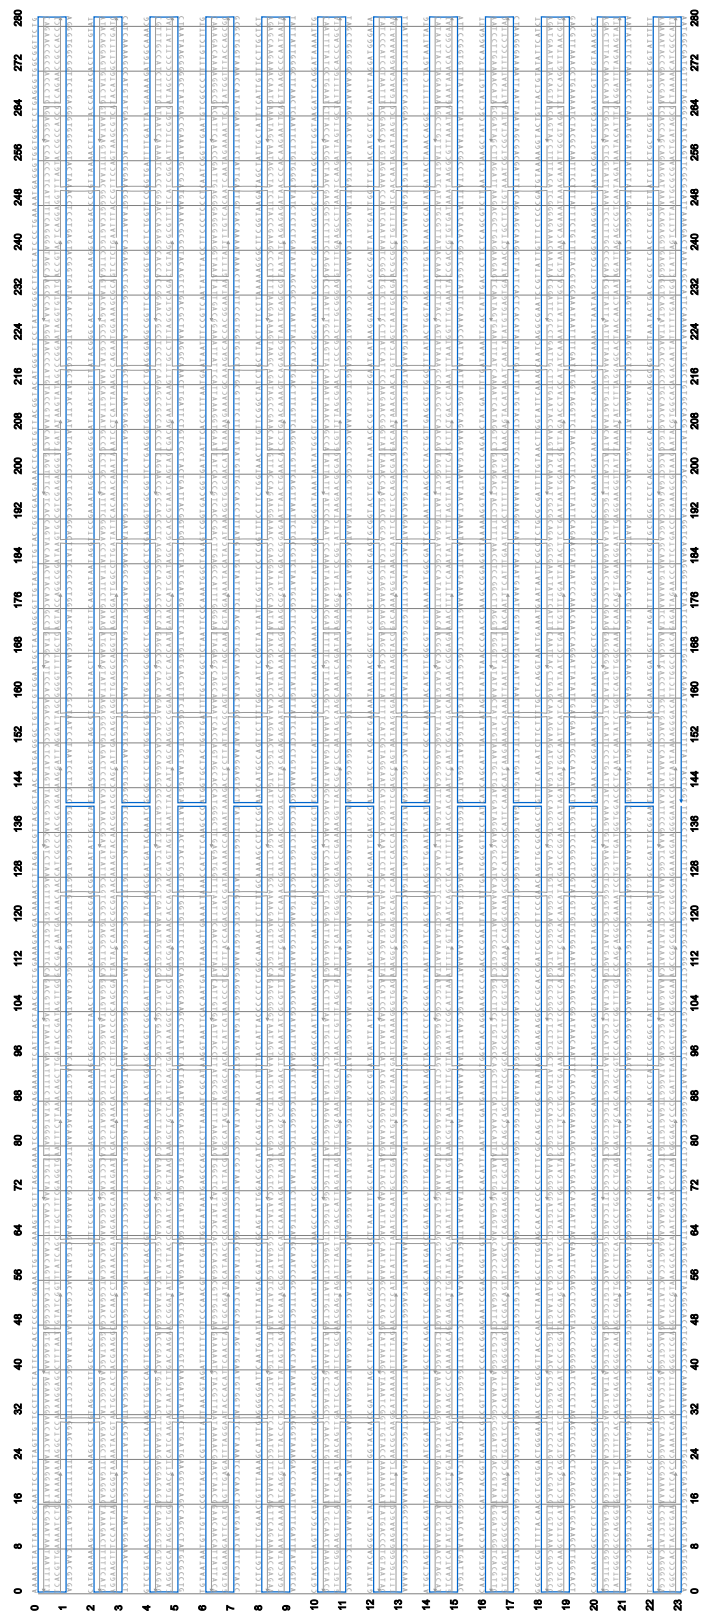

**Supplementary Figure 5:** Design diagram with scaffold and staple strands of the DNA origami rectangle, as generated with Cadnano V1.0.

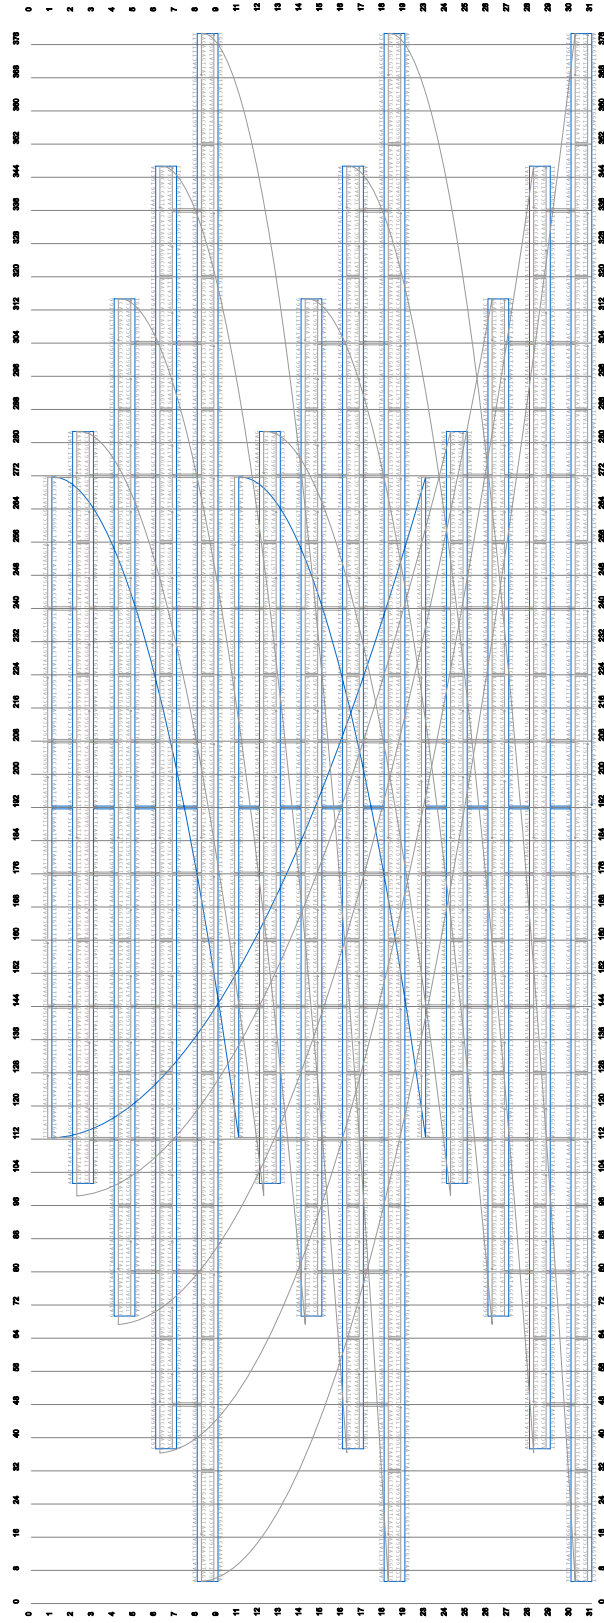

**Supplementary Figure 6:** Design diagram with scaffold and staple strands of the DNA origami triangle, as generated with Cadnano V1.0.

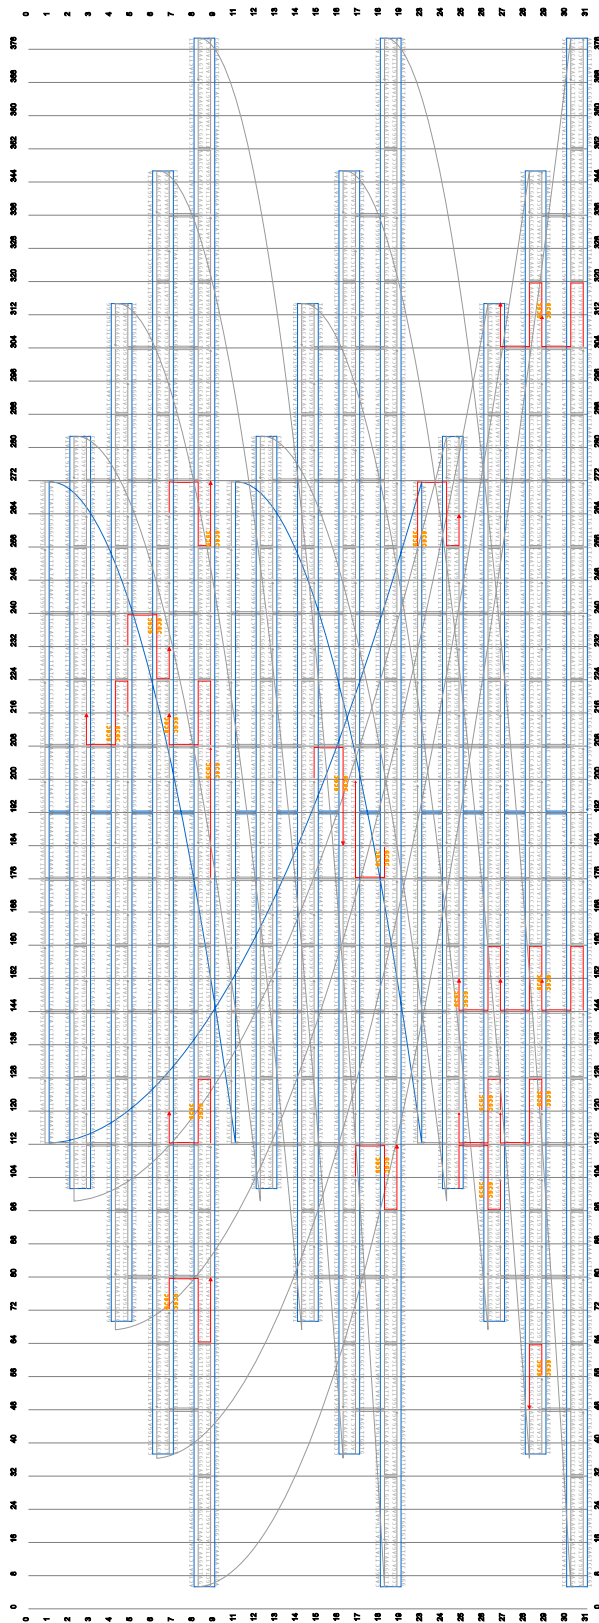

**Supplementary Figure 7:** Design diagram with scaffold and staple strands of the DNA origami triangle, as generated with Cadnano V1.0. HhaI restriction sites sequences are highlighted in yellow, while staples involved in HhaI restriction site formation are highlighted in red (sequences are indicated below).

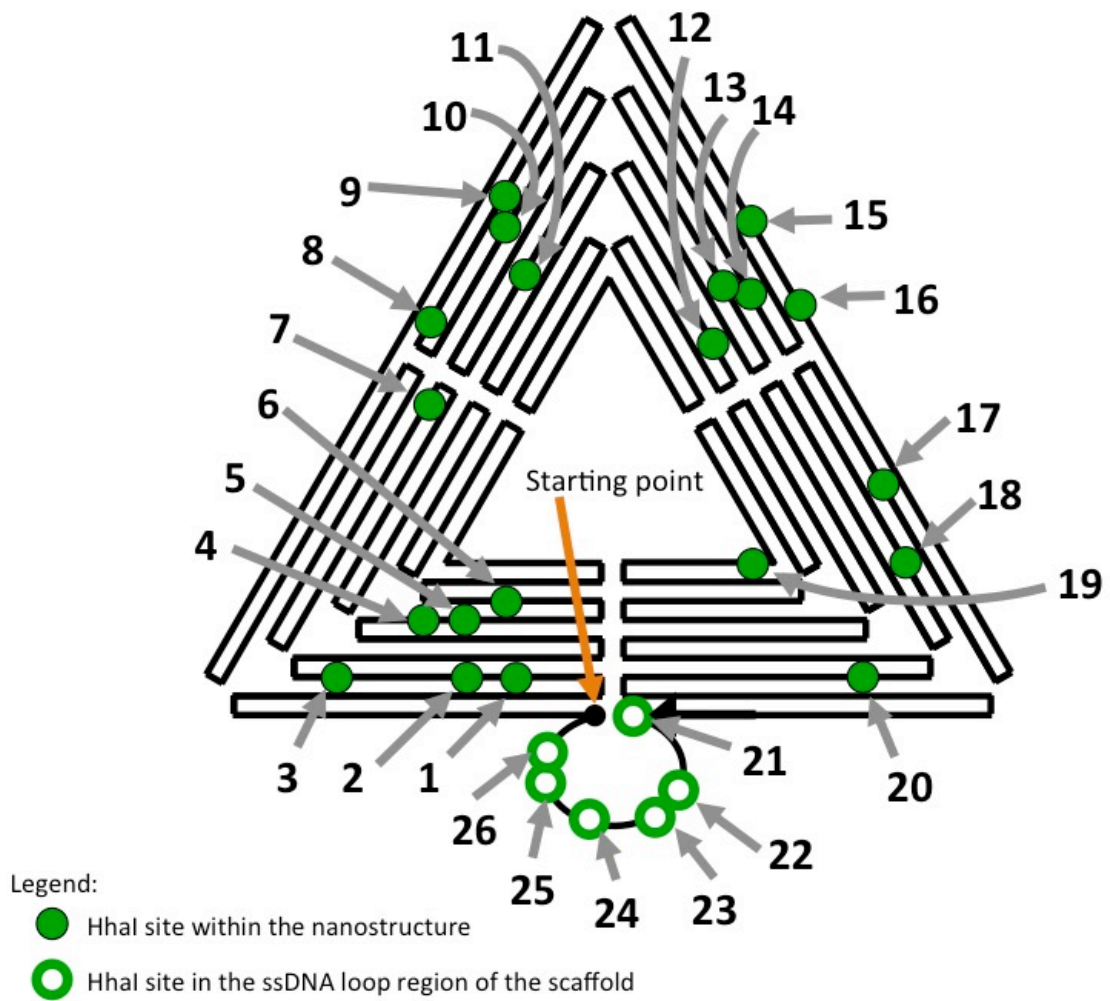

**Supplementary Figure 8:** Map of HhaI sites within the DNA origami triangle described in Supplementary Figure 7. The M13 scaffold (black line routing throughout the structure) and its HhaI sites (circles) are indicated. Sites are indexed in ascending order according to DNA scaffold 5' to 3' direction, starting from the position indicated with the arrow in orange.



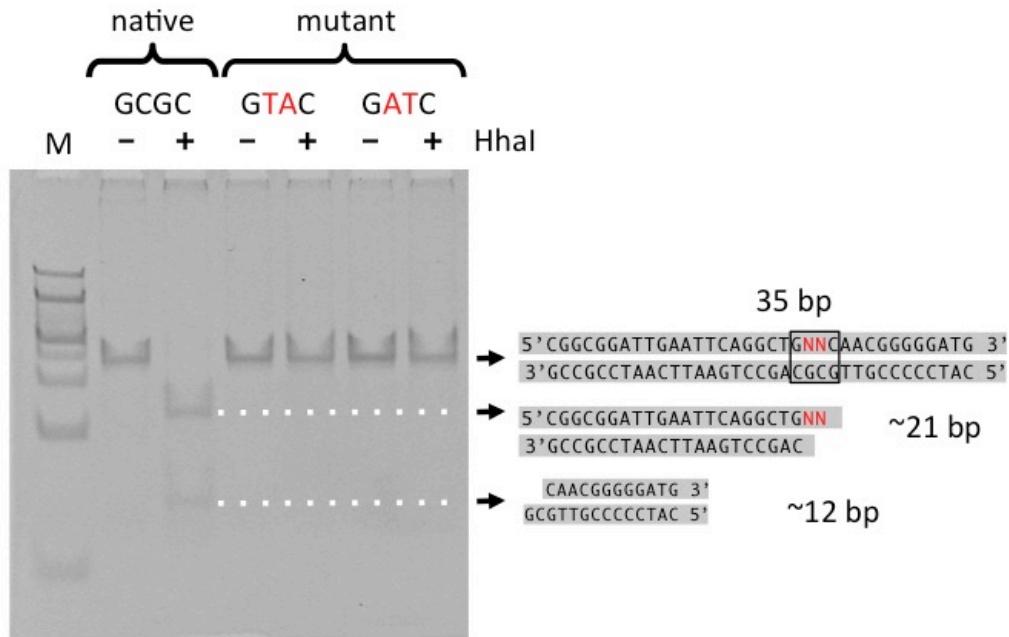

**Supplementary Figure 9:** Effect of HhaI site mutation on HhaI REase action. (Right) The diagram shows the 35 bp double-stranded DNA segment, with the HhaI site in the middle (box). Two mutants were designed by changing the central nucleotides (in red). For each experiment DNA single strands (see page 39 of the SI) were prior mixed at equimolar concentration to obtain a final dsDNA concentration of 1  $\mu$ M in 1X Tango buffer. The DNA containing solution was annealed at 80°C and then cooled down to 20°C with a decreasing temperature rate of -2°C/min (using a Thermocycler). REase reaction conditions: 100 nM dsDNA, 10 units of HhaI REase, 1X Tango Buffer, final volume = 50  $\mu$ L. The reaction was carried out for 1 hour at 37°C (water bath, Julabo GmbH, Seelbach, Germany), and was stopped by freezing the solution at -80°C for 20 min. (Left) the gel image shows the HhaI REase reaction products relative to three HhaI site mutations (native 20% polyacrylamide gel in TBE 1X). The results demonstrate that an alteration of two nt in the HhaI REase recognition sequence within one of the two strands is sufficient to inhibit HhaI action. M, 10 bp DNA ladder (Thermo Fisher Scientific, Waltham, Massachusetts, USA).



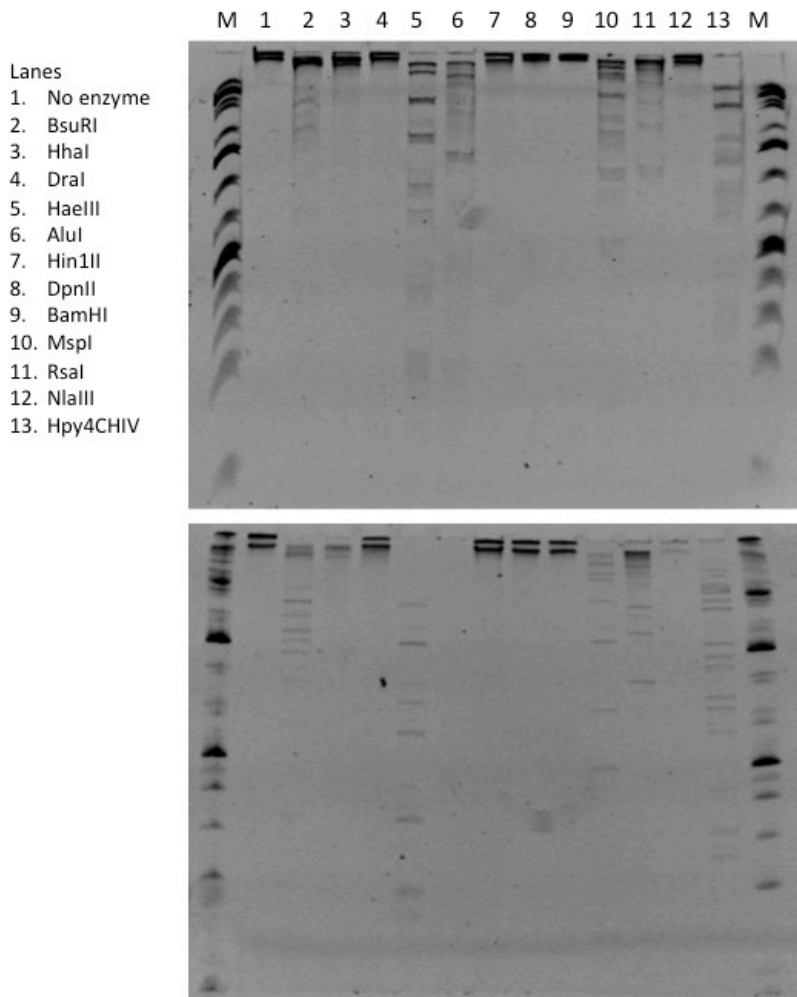

**Supplementary Figure 10:** Identification of dsDNA-specific REases. The two gel images are relative to two independent experiments. Each gel lane displays the ssDNA M13 reaction products for each REase investigated (legend on the left). The results suggest that BsuRI, HaeIII, AluI, MspI, RsaI, Hpy4CHIV REases are capable of cutting ssDNA M13, and demonstrate that the action of HhaI, DraI, Hin1II, DpnII, BamHI, and NlaIII REases is dsDNA-specific. Enzymatic reaction contained 5 nM M13 ssDNA (the same quantity used in DNA origami experiments), 10 units of REase in either 1X Tango Buffer (for AluI, BsuRI, DraI, Hin1II, HhaI, MspI and RsaI REases) or 1X CutSmart Buffer (for DpnII, BamHI, HaeIII, NlaIII and HypCH4IV REases), in a final volume of 50  $\mu$ L. Each, reaction was incubated at 37°C for 1 hour in water bath and was stopped with 20 min incubation at -80°C. The reaction products were electrophoresed with a denaturing (8M Urea) 4% polyacrylamide gel in TBE 1X. M, 1 kb DNA molecular weight marker.

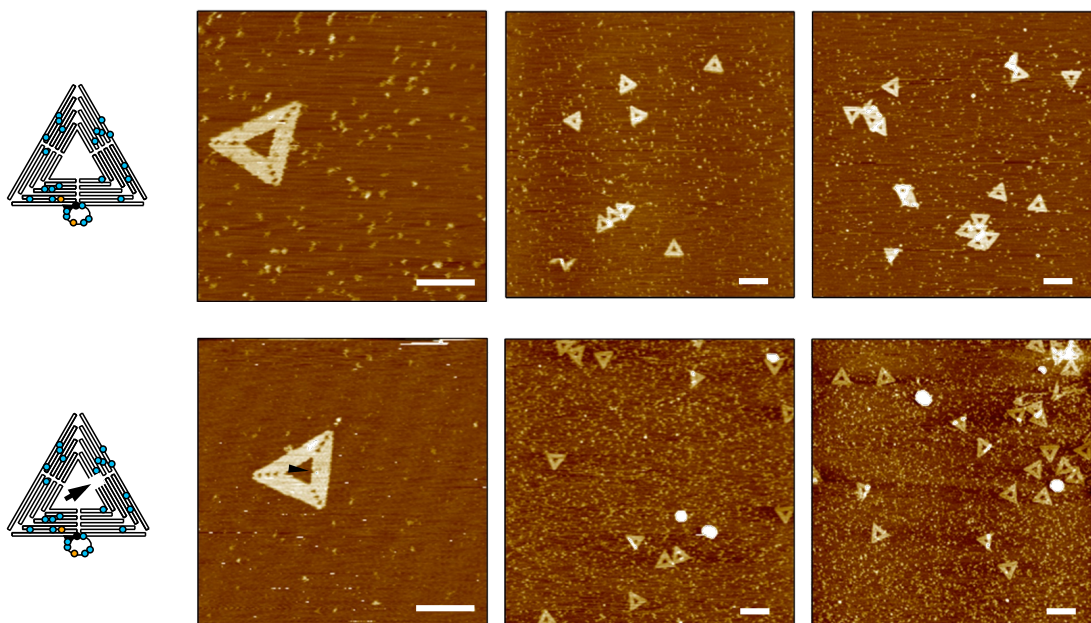

**Supplementary Figure 11:** Atomic Force Microscopy (AFM) characterization of modified DNA origami triangles. Top left, the scheme depicts the 2SS triangle variant having reactive the HhaI site 1, on the right are shown topographic images obtained for this structure. Bottom left, the scheme depicts the 2SS triangle variant having reactive the HhaI site 1 and a defect in the right trapezoidal element, on the right are shown topographic images obtained for this structure. For high zoom images scale bar is 100 nm and scan size is  $0.5 \times 0.5 \mu\text{m}^2$ . For low zoom images scale bar is 200 nm and scan size is  $2.0 \times 2.0 \mu\text{m}^2$ . These results show that the modified triangles can form properly either with the presence of small defects (i.e. mismatches) or larger defects (omission of 4 staples). AFM topographic images were obtained in tapping mode in liquid, using a MFP-3D Stand-Alone AFM (Oxford Instruments - Asylum research, Santa Barbara, CA, USA). Following the assembly reaction of the modified triangles,  $20 \mu\text{L}$  of  $0.5 \text{ nM}$  triangles in the buffering solution of  $40 \text{ mM}$  Tris,  $12.5 \text{ mM}$   $\text{MgCl}_2$ , and  $10 \text{ mM}$   $\text{NiCl}_2$ , were deposited on the freshly cleaved mica, fixed over a  $100 \mu\text{L}$ -volume, homemade liquid cell. The physio-adsorption steps lasted for 10 -15 minutes, and then the substrate was rinsed twice with miliQ water. Next,  $100 \mu\text{L}$  of the assembly buffer ( $40 \text{ mM}$  Tris,  $12.5 \text{ mM}$   $\text{MgCl}_2$ , pH 8.5) was introduced onto the sample to allow enough solution to cover the homemade liquid cell. Afterward, the sample was transferred onto the baseplate of the XY scanning stage and the following parameters were used to acquire the images; AFM mode: AC mode in liquid, cantilever type: BL-AC40TS-C2 (Olympus, Japan), resonant frequency:  $110 \text{ kHz}$ , spring constant:  $0.09 \text{ N/m}$  (as specified by the manufacturer), scan rate:  $1 \text{ Hz}$ . We acquired 4 – 5 images, from different locations of each substrate, at least  $70 \mu\text{m}$  apart with respect to each other. The topographic images were processed with 2<sup>nd</sup> order flattening, and analysed using Igor Pro 6.37 A (Oxford Instruments - Asylum research, Santa Barbara, CA, USA).

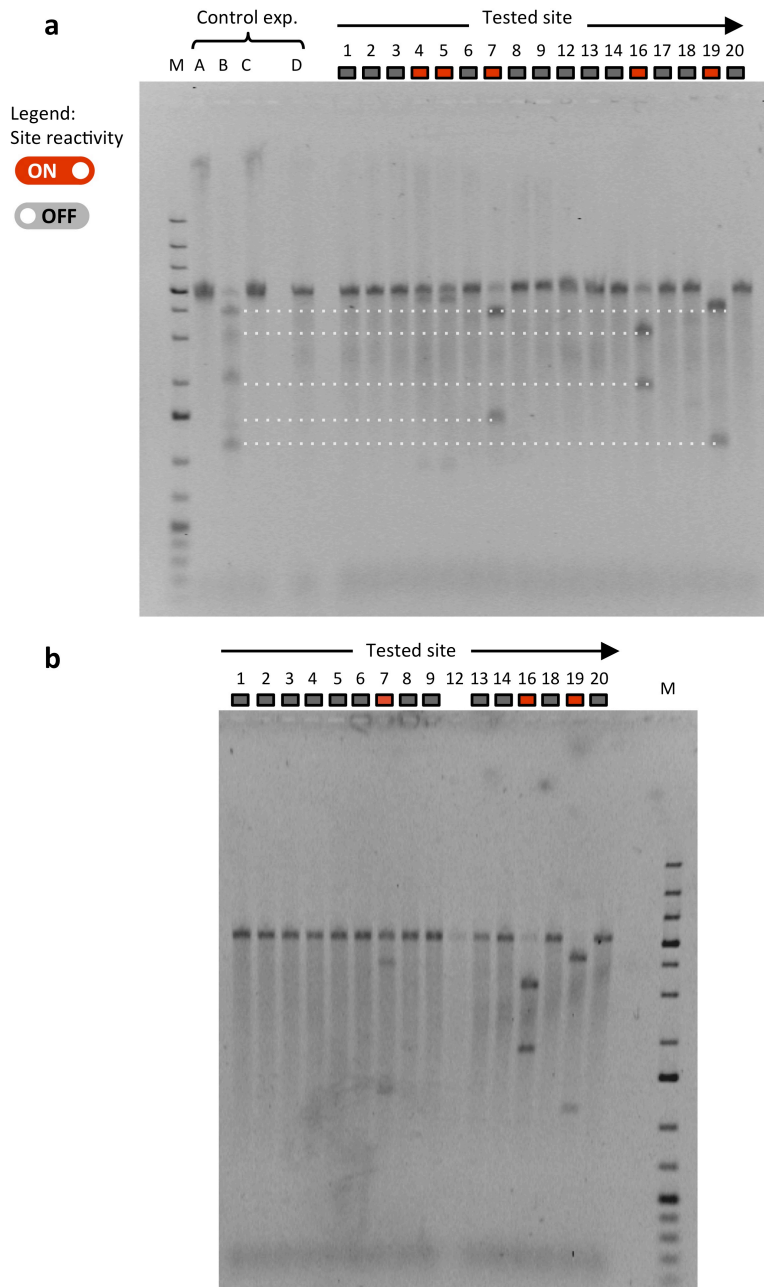

**Supplementary Figure 12:** HhaI REase reactivity of the sharp triangle at single site resolution. (a, b) Two separate experiments were performed on (2SS) sharp triangle variants as described in Fig. 3a. Each lane of the gels (ethidium-bromide-stained 1% agarose) shows the HhaI reaction products for one 2SS triangle variant (as in Fig. 3b). Visible  $F_1$  and  $F_2$  fragments (see bottom diagram in Fig. 3a) appear in both gels for sharp triangles variants containing sites 7, 16 and 19, and also sites 4 and 5 in one case (b). HhaI REase action of the remaining 2SS triangle variants produced a single gel band compatible with  $F_0$  fragments. Control experiments (gel a, left) were carried out with lacking HhaI enzyme (Lane A); in the presence of HhaI and the unmodified triangle (all sites available; Lane B), the triangle variant having all HhaI sites masked (0SS) (Lane C), and the triangle variant having only site 24 available.  $F_1$  and  $F_2$  fragments associated with sites 7, 16 and 19, match migration mobility of fragments of the reacted unmodified triangle in Lane B (white dashed lines). This suggests that, on average, after 1h of REase reaction with in the unmodified DNA nanostructure, only one reactive restriction site can be actually cleaved. M, 1 kb DNA molecular weight marker.

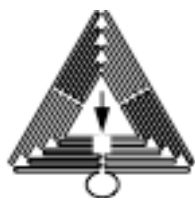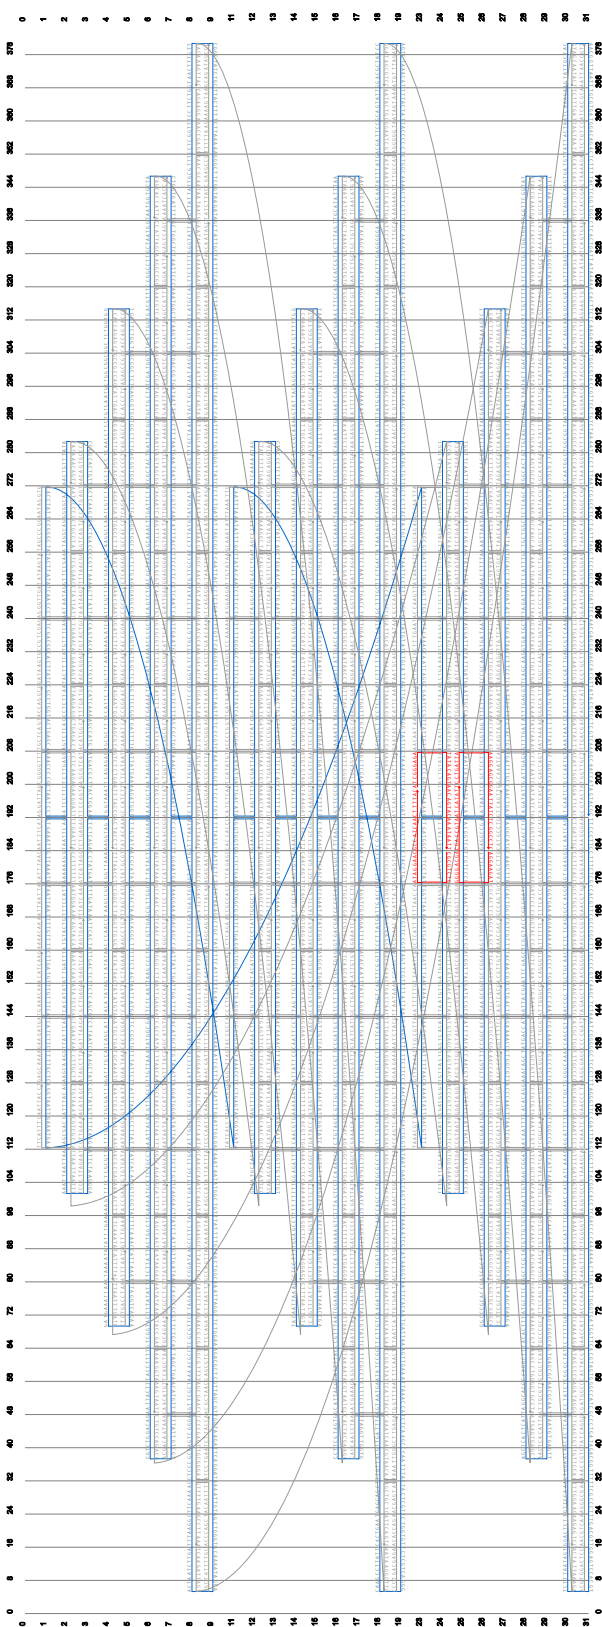

**Supplementary Figure 13:** Design diagram with scaffold and staple strands of the defective, sharp triangular DNA origami, with the defect in trapezium at the bottom (B). Staples marked in red (B1, B2, B33, B34, see below) were omitted. The diagram was generated with Cadnano V0.2.

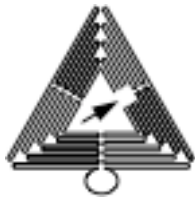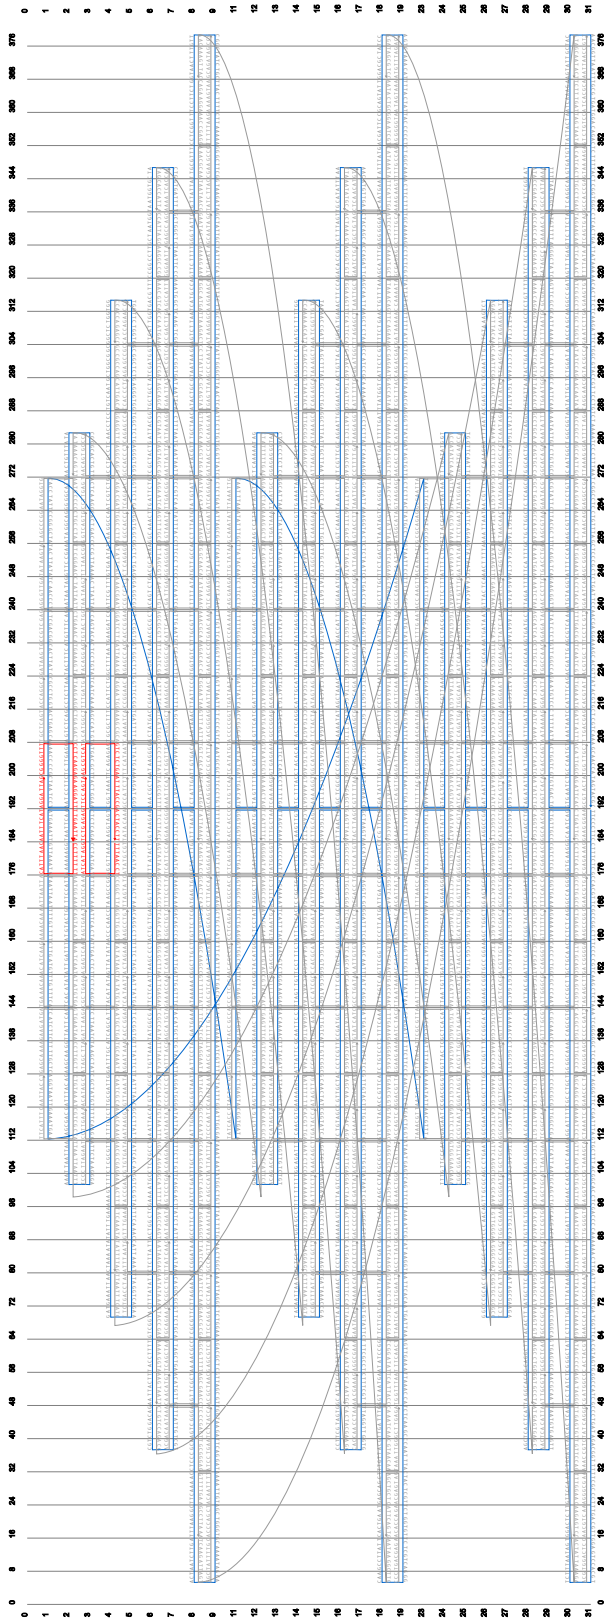

**Supplementary Figure 14:** Design diagram with scaffold and staple strands of the defective, sharp triangular DNA origami, with the defect in trapezium on the right (R). Staples marked in red (R1, R2, R33, R34, see below) were omitting. The diagram was generated with Cadnano V0.2.



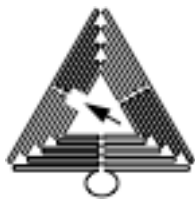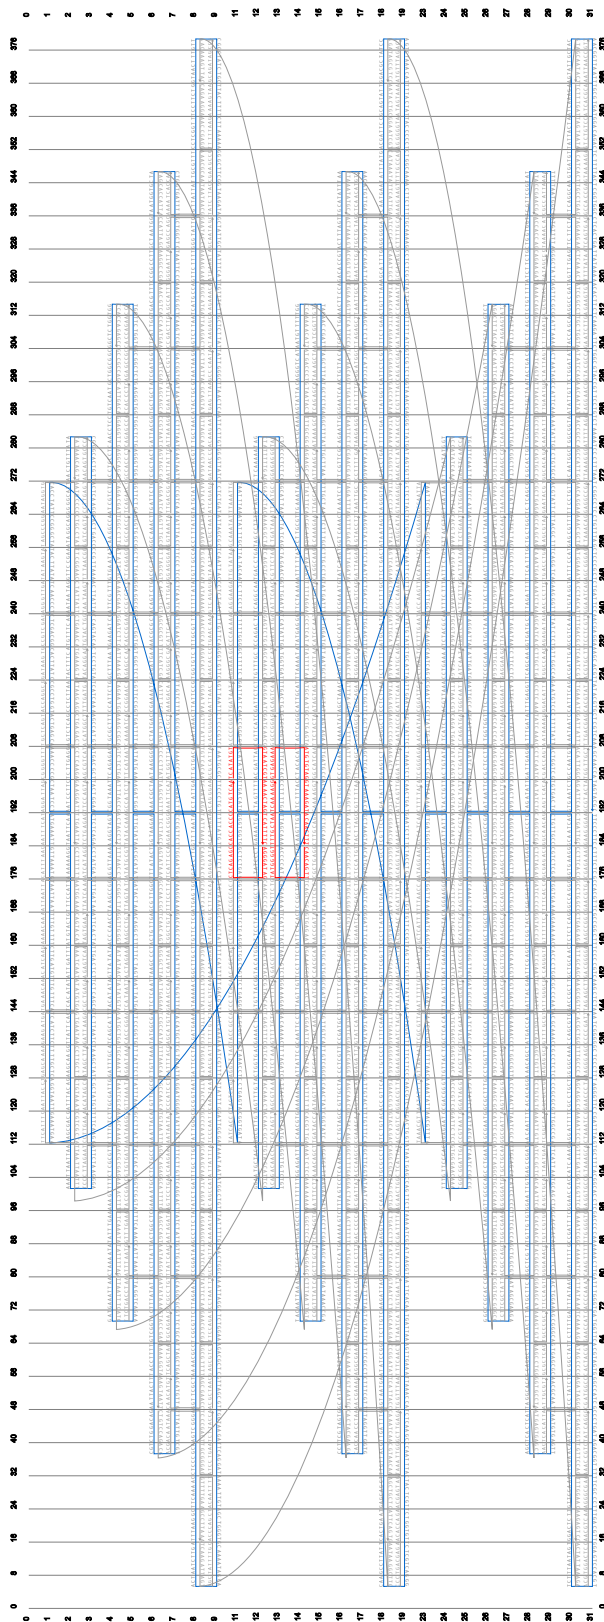

**Supplementary Figure 15:** Design diagram with scaffold and staple strands of the defective, sharp triangular DNA origami, with the defect in trapezium on the left (L). Staples marked in red (L1, L2, L33, L34, see below) were omitted. The diagram was generated with Cadnano V0.2.

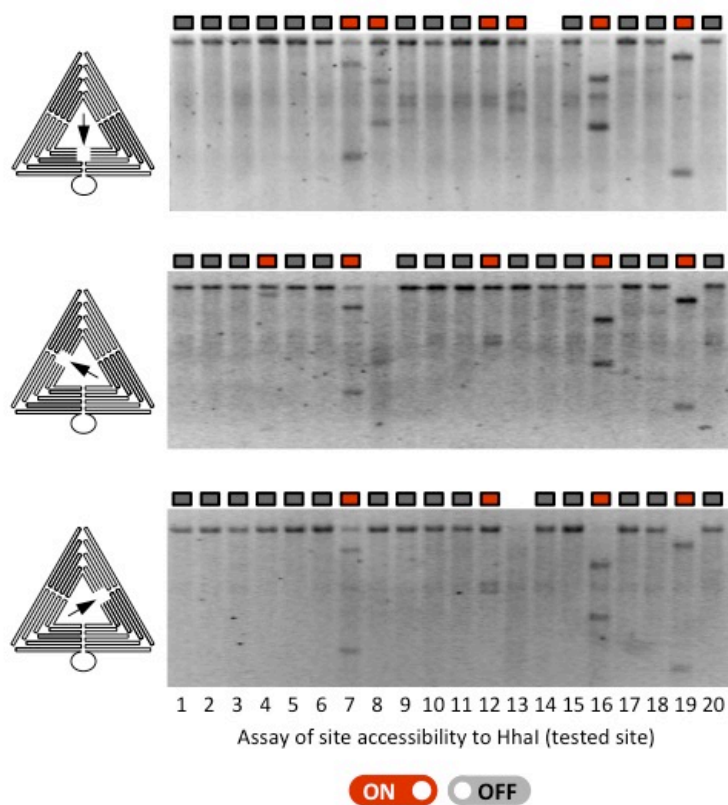

**Supplementary Figure 16:** Gel analysis (Ethidium-bromide-stained 1% agarose gels) of HhaI reaction products for the three defective, sharp triangular DNA origami. Defect is located in trapezoid B, L and R (from top to bottom). The results reproduce those shown in Fig. 4.

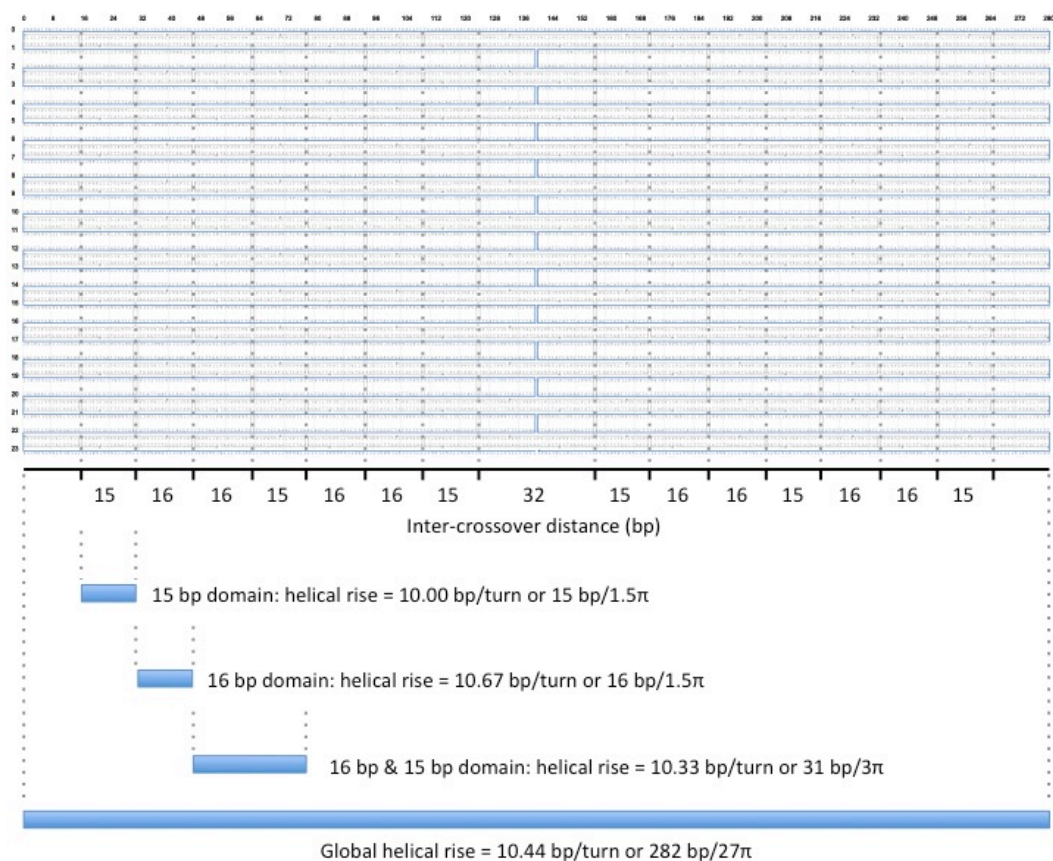

**Supplementary Figure 17:** Determination of the local DNA helical rise in the “twist-corrected” rectangular DNA origami. The figure on top shows the design diagram of such a rectangle from Supplementary Fig. 5 with a global helix rise of 10.44 bp/turn (1). Rothemund and co-workers reported that such type of structure is more relaxed and “flat” than the corresponding uncorrected rectangle that has a helix rise of 10.66 bp/turn (Woo & Rothemund, Nat. Chem. 2011). Under the top diagram, a ruler marks the position of crossover junctions (only those made from staples). From inter-crossover distances, we calculated the helix rise as a function of its spatial position and found that the helix rise values are position-dependent and vary between 10.00 and 10.67 bp/turn.



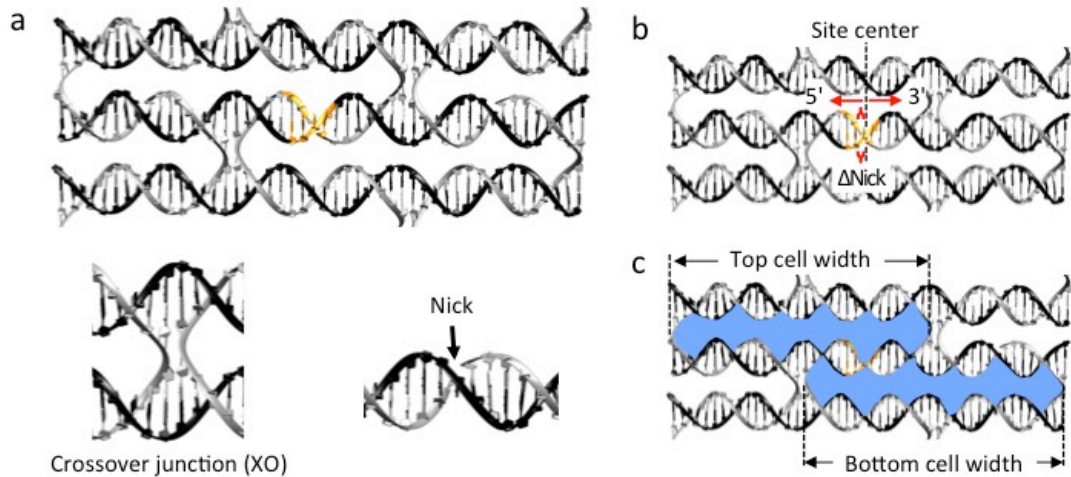

**Supplementary Figure 18:** Structural constraints potentially affecting REase action. (a) (top) Double helical model of DNA molecules surrounding a 4-bp-long HhaI restriction site (yellow) in the sharp triangle (site 1, Fig. 3a), with staple strands in grey and segments of M13 scaffold in black. (bottom) Key structural constraints affecting REase action such as crossover junction and DNA nick. (b) In our model (Fig. 5), nicks are considered that flank the restriction site and are within the nearest (two) crossover junctions. Nicks, however, can also be within the DNA double helix that contains the REase site. In such case,  $\Delta\text{Nick}$  is defined as the distance (in bp) between the nick and the site centre (red arrows), and can be located towards either the 3' or 5' end of the scaffold segment that carries the site. For the illustrated case (site 1 in the DNA sharp triangle)  $\Delta\text{Nick} = 1 \text{ bp} \rightarrow 3'$ . (c) For each site, the top and bottom "cells" (in blue) are comprised of adjacent, double helical DNA segments (one of which contain the site) and the interconnecting crossover junctions. The "cell width" is defined as the bp distance between these junctions. The illustrated site 1 in the sharp triangle has two "cells", 32 bp in width each. To obtain the double helical models shown in this figure (as well as those presented in Figs 1 and 5), DNA nanostructure diagrams were generated as Cadnano (2) designs that were then submitted to the online tool Cando (3) (using default settings) to obtain inherent, molecular representations in .pdb format, which were finally visualised and adapted with Chimera (4).

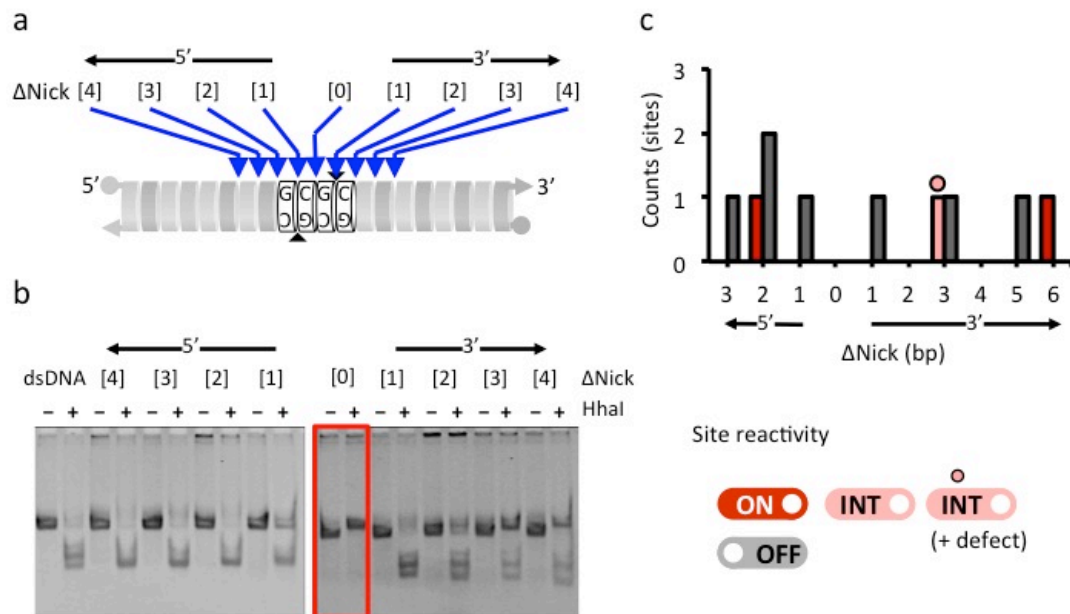

**Supplementary Figure 19:** Influence of a nick adjacent or within the HhaI site on its reactivity. (a) Diagram of the different, tested dsDNA molecules. Experiments were performed on 64 bp long dsDNAs with a HhaI restriction site in the middle and a nick in different positions (blue arrows). Black triangles indicate the phosphodiester bonds that are cleaved by HhaI. Three ssDNA molecules (see page 40 of the SI) were mixed to form the dsDNA variants, with each strand at 1  $\mu\text{M}$  concentration in 40 mM Tris, 12.5 mM MgCl<sub>2</sub>, pH 8.5 in a volume of 25  $\mu\text{L}$ . The DNA was annealed by heating at 80°C and then cooling down to 20°C the solution with a decreasing temperature rate of -2°C/min. The reaction was performed in 50  $\mu\text{L}$  containing 100 nM dsDNA and 10 units of HhaI enzyme in 1X Tango Buffer. The reaction was incubated for 1 hour at 37°C in water bath and was stopped by freezing to -80°C for 20 min. (b) Gel analysis (Ethidium-bromide 18% polyacrylamide in 1X TBE) of the HhaI reaction products. All dsDNA molecules are equally reactive, except that carrying a nick in the site centre ( $\Delta\text{Nick}=0$ ), which results to be fully resistant. (c) Number of HhaI sites in the sharp DNA triangle as a function of  $\Delta\text{Nick}$  (see Supplementary Fig. 18b). While certain HhaI sites are unreactive, none is found with  $\Delta\text{Nick}=0$ . Therefore  $\Delta\text{Nick}$  does not seem to be an antideterminant of HhaI REase action, and was taken into account in our mechanical model (Fig. 5).

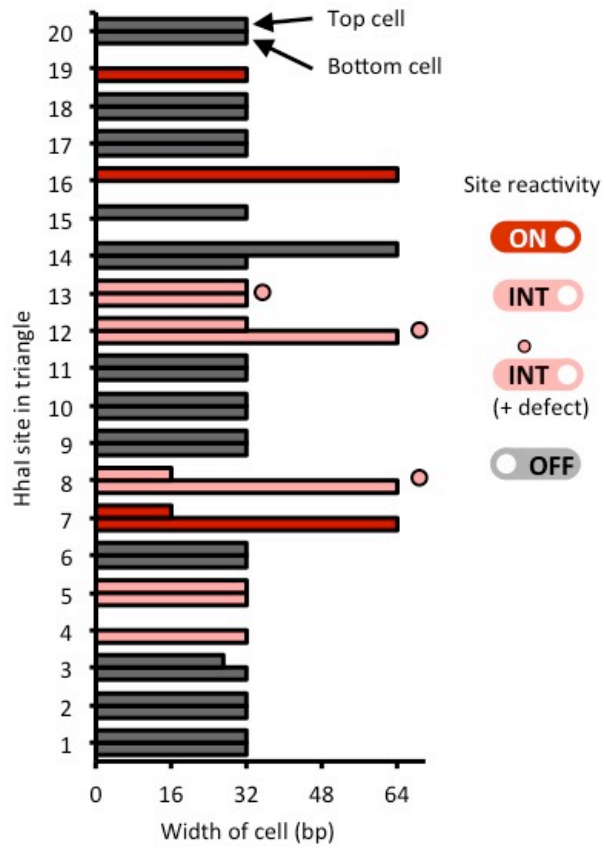

**Supplementary Figure 20:** Influence on HhaI site reactivity of the length of the double helical segments bounded by crossover junctions that flank the HhaI site in the sharp triangular DNA origami. For each site, the plot illustrates the widths of the upper and bottom “cells” for each HhaI site in the sharp DNA triangle, as defined in Supplementary Fig. 18c. For sites 4, 15, 16 and 19 that are located on a nanostructure edges, a single value is provided (as a single “cell” is definable).

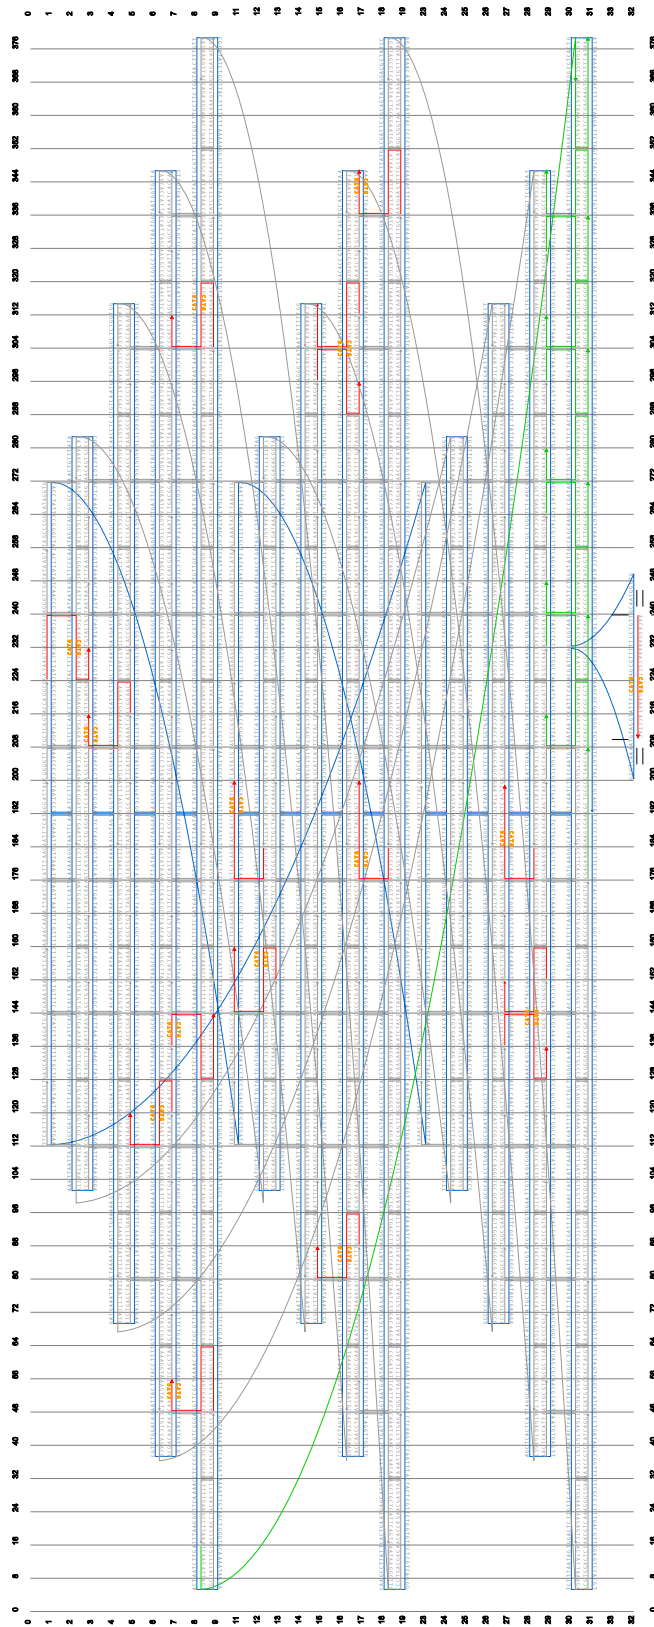

**Supplementary Figure 21:** Design diagram with scaffold and staple strands of the DNA origami triangle, as generated with Cadnano V1.0. Hin1II restriction sites sequences are highlighted in yellow; staples involved in Hin1II restriction site formation are highlighted in red (sequences are indicated below in page 40-41 of SI); other staples were modified to introduce an unfolded DNA sequence that protrudes from the nanostructure and contains a reference restriction site (in green).

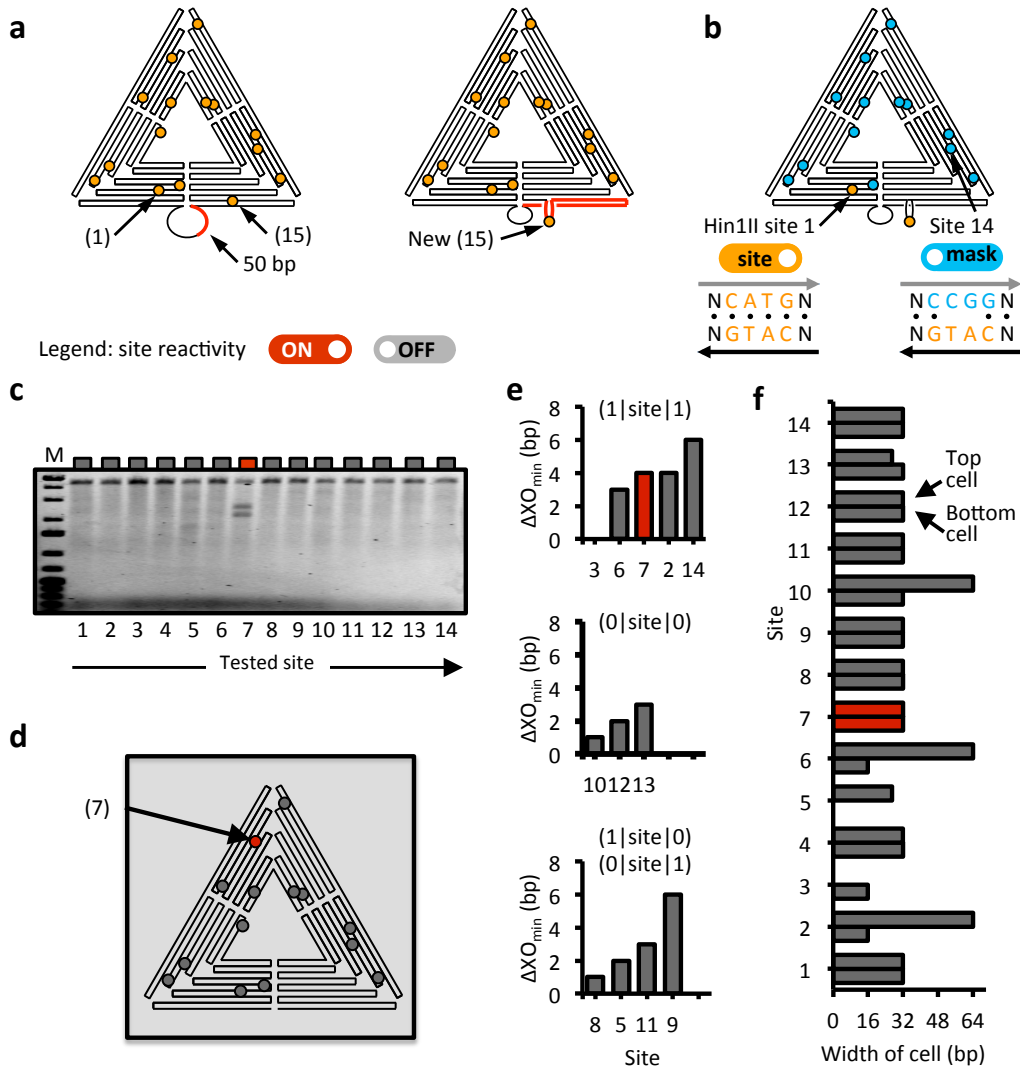

**Supplementary Figure 22:** Hin1II REase reactivity of the sharp triangle at the single-site level. (a) (Left) diagram of the sharp DNA triangle investigated in Fig. 1, with the routing M13 DNA scaffold (black line) and 15 Hin1II restriction sites (yellow circles). The design on the left lacks Hin1II sites to use as reference. (Right) A sharp DNA triangle variant is designed by varying the folding pattern of the M13 scaffold (red) to allow a Hin1II restriction site (no. 15) to be highly reactive. The repositioned site is located within an unfolded portion of the M13 sequence that protrudes from the nanostructure (see the DNA origami design in Supplementary Fig. 21 and the DNA sequences at page 40-41 of the SI). (b) Fourteen (“two sites states” or “2SS”) sharp triangle variants containing only two Hin1II sites (one of which is the reference) were generated following the approach described in Fig. 3 (see the DNA origami design in Supplementary Fig. 21, and the DNA sequences at page 40-41 of the SI). Briefly, the Hin1II recognition sequence (5'-CATG-3', in orange) in all staples except two was changed to 5'-CCGG-3' (in blue) for masking Hin1II sites. (c) Agarose gel analysis (Ethidium-bromide-stained 1% agarose gel) of Hin1II reaction products of 2SS triangle variants. F1 and F2 fragments appear only for the site 7. (d) A sharp triangle diagram shows the position of reactive Hin1II site in the nanostructure, according to the results shown in (c). (e) Parameterisation of site reactivity according to Fig. 5a-c. For each mechanical configuration (see Fig. 5b), the value of  $\Delta XO_{\min}$  associated to Hin1II sites is plotted in ascending order as a function of the site index (in analogy to Fig. 5c for HhaI). (f) Widths of the top and bottom “cells” for each Hin1II site in the sharp DNA triangle (see Supplementary Fig. 18c).

|       |     | EXPERIMENT     |                |
|-------|-----|----------------|----------------|
|       |     | ON             | OFF            |
| MODEL | ON  | True ON<br>1   | False ON<br>1  |
|       | OFF | False OFF<br>1 | True OFF<br>11 |

|       |     | EXPERIMENT     |                |
|-------|-----|----------------|----------------|
|       |     | ON             | OFF            |
| MODEL | ON  | True ON<br>3   | False ON<br>1  |
|       | OFF | False OFF<br>0 | True OFF<br>16 |

$$(1) T_{ON} = \frac{\text{True ON}}{\text{True ON} + \text{False OFF}}$$

$$(2) F_{OFF} = \frac{\text{False OFF}}{\text{False OFF} + \text{True OFF}} = 1 - T_{ON}$$

$$(3) T_{OFF} = \frac{\text{True OFF}}{\text{True OFF} + \text{False ON}}$$

$$(4) F_{ON} = \frac{\text{False ON}}{\text{False ON} + \text{True OFF}} = 1 - T_{OFF}$$

$$(5) \text{Accuracy} = \frac{\text{True ON} + \text{True OFF}}{\text{Total number of sites}}$$

**Supplementary Figure 23:** Analysis of model performance in determining site reactivity on a site-by-site basis. (Left) The contingency tables summarise model reactivity testing for Hin1II and HhaI sites in sharp triangular DNA origami, based on site-by-site experiments. Site reactivities extrapolated from experiments (horizontal) are matched with expectations (vertical). “True ON” are all sites that experimentally result to be reactive (and therefore are defined as “ON”), and which are correctly identified by the model. Similarly, “True OFF” are all sites that experimentally result to be unreactive (and therefore are defined as “OFF”), and which are correctly identified by the model. “False OFF” are all sites that experimentally result to be reactive (and therefore are defined as “ON”), but which the model fails to identify as such. Similarly, “False ON” are all sites that experimentally result to be unreactive (and therefore are defined as “OFF”), but which the model fails to identify as such. “True ON rate” ( $T_{ON}$ ) and “True OFF rate” ( $T_{OFF}$ ) provide a measure of model’s ability to correctly detect REases site reactivity, and were calculated using equations (1) and (2). “False OFF rate” ( $F_{OFF}$ ) and “False ON rate” ( $F_{ON}$ ) provide a measure of the model’s incompetence in detecting site reactivity, and were calculated using equations (3) and (4). The accuracy of the model was calculated separately for both Hin1II and HhaI REases using equation (5).

**Supplementary Table 1:** expected length of F<sub>1</sub> and F<sub>2</sub> DNA scaffold fragments generated by the combined cleavage of the two indicated HhaI sites (24 is the reference). F<sub>1</sub> is defined as the longest. nt, (nucleotides).

| (Tested site):(Reference site) | F <sub>1</sub> fragment length (nt) | F <sub>2</sub> fragment length (nt) |
|--------------------------------|-------------------------------------|-------------------------------------|
| (4):(24)                       | 6357                                | 892                                 |
| (5):(24)                       | 6336                                | 913                                 |
| (7):(24)                       | 5489                                | 1760                                |
| (16):(24)                      | 4811                                | 2438                                |
| (19):(24)                      | 6027                                | 1222                                |

**Supplementary Table 2:** Values of  $\Delta X_{O_{min}}$  and structural states for each restriction site recognised by Hin1II and NlaIII (5'-CATG), HaeIII and BsuRI (5'-GGCC), MspI (5'-CCGG), RsaI (5'-GTAC), Hpy4CHIV (5'-ACGT), and AluI (5'-AGCT), in the sharp triangular DNA origami, as depicted in Fig. 5a-b.

| enzyme (isoschizomer) | scaffold region | # site | $\Delta X_{O_{min}}$ | site configuration |
|-----------------------|-----------------|--------|----------------------|--------------------|
| Hin1II (NlaIII)       | structured      | 1      | -1                   | (0   site   0)     |
| Hin1II (NlaIII)       | structured      | 2      | 4                    | (1   site   1)     |
| Hin1II (NlaIII)       | structured      | 3      | 0                    | (1   site   1)     |
| Hin1II (NlaIII)       | structured      | 4      | -2                   | (0   site   0)     |
| Hin1II (NlaIII)       | structured      | 5      | 2                    | (0   site   0)     |
| Hin1II (NlaIII)       | structured      | 6      | 3                    | (1   site   1)     |
| Hin1II (NlaIII)       | structured      | 7      | 4                    | (1   site   1)     |
| Hin1II (NlaIII)       | structured      | 8      | 1                    | (0   site   1)     |
| Hin1II (NlaIII)       | structured      | 9      | 6                    | (0   site   1)     |
| Hin1II (NlaIII)       | structured      | 10     | 1                    | (0   site   0)     |
| Hin1II (NlaIII)       | structured      | 11     | 3                    | (1   site   0)     |
| Hin1II (NlaIII)       | structured      | 12     | 2                    | (0   site   0)     |
| Hin1II (NlaIII)       | structured      | 13     | 3                    | (1   site   1)     |
| Hin1II (NlaIII)       | structured      | 14     | 6                    | (0   site   0)     |
| Hin1II (NlaIII)       | structured      | 15     | -1                   | (0   site   0)     |
| HaeIII (BsuRI)        | structured      | 1      | 8                    | (0   site   1)     |
| HaeIII (BsuRI)        | structured      | 2      | 4                    | (1   site   0)     |
| HaeIII (BsuRI)        | structured      | 3      | 2                    | (0   site   0)     |
| HaeIII (BsuRI)        | structured      | 4      | 5                    | (0   site   0)     |
| HaeIII (BsuRI)        | structured      | 5      | 0                    | (1   site   0)     |
| HaeIII (BsuRI)        | structured      | 6      | 2                    | (0   site   0)     |
| HaeIII (BsuRI)        | structured      | 7      | -1                   | (0   site   0)     |
| HaeIII (BsuRI)        | structured      | 8      | 0                    | (0   site   0)     |
| HaeIII (BsuRI)        | structured      | 9      | 4                    | (0   site   0)     |
| HaeIII (BsuRI)        | structured      | 10     | 3                    | (1   site   1)     |
| HaeIII (BsuRI)        | structured      | 11     | 2                    | (1   site   1)     |
| HaeIII (BsuRI)        | structured      | 12     | 1                    | (0   site   0)     |
| HaeIII (BsuRI)        | structured      | 13     | 3                    | (1   site   0)     |
| HaeIII (BsuRI)        | structured      | 14     | 13                   | (0   site   1)     |
| HaeIII (BsuRI)        | structured      | 15     | 10                   | (0   site   1)     |



| enzyme (isoschizomer) | scaffold region | # site | $\Delta X O_{min}$ | site configuration |
|-----------------------|-----------------|--------|--------------------|--------------------|
| MspI                  | structured      | 1      | 3                  | (0 site 1)         |
| MspI                  | XO              | 2      | -2                 |                    |
| MspI                  | structured      | 3      | 5                  | (1 site 1)         |
| MspI                  | structured      | 4      | 4                  | (1 site 1)         |
| MspI                  | structured      | 5      | 2                  | (1 site 1)         |
| MspI                  | structured      | 6      | 3                  | (1 site 0)         |
| MspI                  | structured      | 7      | -2                 | (0 site 0)         |
| MspI                  | structured      | 8      | 2                  | (0 site 0)         |
| MspI                  | structured      | 9      | -1                 | (0 site 0)         |
| MspI                  | structured      | 10     | 0                  | (1 site 0)         |
| MspI                  | XO              | 11     |                    |                    |
| MspI                  | structured      | 12     | 8                  | (1 site 0)         |
| MspI                  | structured      | 13     | 2                  | (0 site 0)         |
| MspI                  | structured      | 14     | 4                  | (0 site 0)         |
| MspI                  | structured      | 15     | 0                  | (1 site 1)         |
| MspI                  | structured      | 16     | 0                  | (1 site 0)         |
| MspI                  | structured      | 17     | 2                  | (0 site 0)         |
| MspI                  | structured      | 18     | 0                  | (1 site 1)         |
| RsaI                  | structured      | 1      | 3                  | (1 site 1)         |
| RsaI                  | structured      | 2      | -2                 | (1 site 0)         |
| RsaI                  | XO              | 3      |                    |                    |
| RsaI                  | structured      | 4      | 1                  | (1 site 1)         |
| RsaI                  | structured      | 5      | 4                  | (0 site 0)         |
| RsaI                  | structured      | 6      | 2                  | (1 site 0)         |
| RsaI                  | structured      | 7      | -1                 | (0 site 0)         |
| RsaI                  | structured      | 8      | 4                  | (1 site 0)         |
| RsaI                  | structured      | 9      | 5                  | (0 site 1)         |
| RsaI                  | structured      | 10     | 7                  | (1 site 0)         |
| RsaI                  | structured      | 11     | 6                  | (1 site 0)         |
| RsaI                  | structured      | 12     | 3                  | (1 site 0)         |
| RsaI                  | structured      | 13     | 1                  | (0 site 0)         |
| RsaI                  | structured      | 14     | 4                  | (0 site 0)         |
| RsaI                  | structured      | 15     | 2                  | (1 site 1)         |
| RsaI                  | structured      | 16     | 0                  | (0 site 1)         |
| RsaI                  | structured      | 17     | 8                  | (1 site 1)         |
| RsaI                  | structured      | 18     | 26                 | (0 site 1)         |
| RsaI                  | loop            | 19     |                    |                    |

| enzyme (isoschizomer) | scaffold region | # site | $\Delta XO_{min}$ | DNA segments configuration |
|-----------------------|-----------------|--------|-------------------|----------------------------|
| Hpy4CHIV              | structured      | 1      | 10                | (0 site 1)                 |
| Hpy4CHIV              | structured      | 2      | 0                 | (0 site 1)                 |
| Hpy4CHIV              | structured      | 3      | 11                | (1 site 1)                 |
| Hpy4CHIV              | structured      | 4      | 0                 | (1 site 1)                 |
| Hpy4CHIV              | structured      | 5      | 4                 | (0 site 0)                 |
| Hpy4CHIV              | structured      | 6      | 1                 | (0 site 0)                 |
| Hpy4CHIV              | structured      | 7      | 3                 | (1 site 0)                 |
| Hpy4CHIV              | structured      | 8      | 13                | (0 site 1)                 |
| Hpy4CHIV              | structured      | 9      | 2                 | (0 site 1)                 |
| Hpy4CHIV              | structured      | 10     | 5                 | (1 site 0)                 |
| Hpy4CHIV              | structured      | 11     | 7                 | (1 site 1)                 |
| Hpy4CHIV              | structured      | 12     | 3                 | (1 site 1)                 |
| Hpy4CHIV              | structured      | 13     | 2                 | (0 site 0)                 |
| Hpy4CHIV              | structured      | 14     | 2                 | (1 site 1)                 |
| Hpy4CHIV              | structured      | 15     | 4                 | (1 site 0)                 |
| Hpy4CHIV              | structured      | 16     | 11                | (0 site 1)                 |
| Hpy4CHIV              | structured      | 17     | 4                 | (0 site 1)                 |
| Hpy4CHIV              | structured      | 18     | 3                 | (0 site 1)                 |
| Hpy4CHIV              | structured      | 19     | 3                 | (1 site 1)                 |
| Hpy4CHIV              | structured      | 20     | 0                 | (0 site 0)                 |
| Hpy4CHIV              | structured      | 21     | 0                 | (0 site 0)                 |
| Hpy4CHIV              | structured      | 22     | 3                 | (0 site 1)                 |
| AluI                  | structured      | 1      | 9                 | (0 site 1)                 |
| AluI                  | XO              | 2      |                   |                            |
| AluI                  | structured      | 3      | 1                 | (0 site 0)                 |
| AluI                  | structured      | 4      | 0                 | (1 site 0)                 |
| AluI                  | structured      | 5      | 4                 | (1 site 1)                 |
| AluI                  | structured      | 6      | -1                | (0 site 0)                 |
| AluI                  | structured      | 7      | 2                 | (1 site 1)                 |
| AluI                  | structured      | 8      | 5                 | (0 site 0)                 |
| AluI                  | structured      | 9      | 0                 | (0 site 0)                 |
| AluI                  | structured      | 10     | -2                | (0 site 0)                 |
| AluI                  | structured      | 11     | 13                | (1 site 0)                 |
| AluI                  | XO              | 12     |                   |                            |
| AluI                  | structured      | 13     | -2                | (0 site 0)                 |
| AluI                  | structured      | 14     | 1                 | (0 site 0)                 |
| AluI                  | structured      | 15     | 0                 | (1 site 1)                 |
| AluI                  | structured      | 16     | 4                 | (1 site 1)                 |
| AluI                  | structured      | 17     | -2                | (1 site 0)                 |
| AluI                  | structured      | 18     | 4                 | (0 site 0)                 |
| AluI                  | structured      | 19     | 0                 | (0 site 0)                 |
| AluI                  | structured      | 20     | 0                 | (1 site 0)                 |
| AluI                  | structured      | 21     | 0                 | (0 site 0)                 |
| AluI                  | structured      | 22     | -1                | (1 site 0)                 |
| AluI                  | structured      | 23     | 13                | (0 site 1)                 |
| AluI                  | structured      | 24     | 8                 | (0 site 1)                 |
| AluI                  | structured      | 25     | 2                 | (0 site 0)                 |
| AluI                  | structured      | 26     | 2                 | (0 site 0)                 |
| AluI                  | structured      | 27     | -2                | (0 site 1)                 |

**Supplementary Table 3:** Estimation of the number of the reactive sites in sharp triangular DNA origami for each investigated restriction endonuclease. Values are obtained by counting the number of gel bands produced by separating scaffold fragments after the reaction with the sharp DNA triangle described in Supplementary Fig. 2. HhaI produces 6 major gel bands and therefore there are 3 HhaI reactive sites in the nanostructure (see the diagram describing scaffold fragmentation depicted at the bottom Fig. 1a).

| Restriction endonuclease | Estimated accessible sites | average | Fig. 1d | Suppl. Fig. 2a (right) | Suppl. Fig. 2b | Suppl. Fig. 2c |
|--------------------------|----------------------------|---------|---------|------------------------|----------------|----------------|
| Hin1II                   | 0                          | 1       | 1       |                        | 1              | 1              |
| NlaIII                   | 0                          | 1       |         | 1                      |                |                |
| BsuRI                    | 2                          | 3       |         | 3                      |                |                |
| HaeIII                   | 3                          | 4       |         | 4                      | 4              | 5              |
| MspI                     | 3                          | 5       | 5       |                        | ND             | 5              |
| RsaI                     | 2                          | 3       | 4       |                        | 2              | 2              |
| Hpy4CHIV                 | 4                          | 7       | 6       |                        | ND             | 8              |
| HhaI                     | 3                          | 6       | 6       |                        | 5              | 6              |
| AluI                     | 4                          | 8       | 7       |                        | ND             | 8              |

## List of DNA sequences

### M13mp18 DNA sequence scaffold in the sharp triangular and rectangular DNA origami. (5' - 3').

TTCCCTTCCTTCTCGCCACGTTCCGCCGCTTCCCGTCAAGCTCTAAATCGGGGGCTCCCTTTAGGGTCCGAT  
TTAGTGCTTTACGGCACCTCGACCCCAAAAACTTGATTTGGGTGATGGTTCACGTAGTGGGCCATCGCCCTGA  
TAGACGGTTTTTCGCCCTTGACGTTGGAGTCCACGTTCTTTAATAGTGGACTCTTGTCCAAACTGGAACAACA  
CTCAACCTATCTCGGGCTATTCTTTGATTTATAAGGGATTTGCGGATTTCGGAACCACCATCAAACAGGATTT  
TCGCCTGCTGGGCAAACCAGCGTGGACCGCTTCTGCAACTCTCTCAGGGCCAGGCGGTGAAGGGCAATCAG  
CTGTTGCCGTCTCGCTGGTAAAAAGAAAAACCACCCTGGCGCCAATACGCAAACCGCTCTCCCGCGCGTT  
GGCCGATTCATTAATGCAGCTGGCAGCACAGGTTCCCGACTGGAAAGCGGGCAGTGAGCGCAACGCAATTA  
TGTGAGTTAGCTCACTATTAGGCACCCAGGCTTACACTTTATGCTTCCGGCTCGTATGTTGTGTGGAATTGT  
GAGCGGATAACAATTTACACAGGAAACAGCTATGACCATGATTACGAATTCGAGCTCGGTACCCGGGGATCC  
TCTAGAGTCGACCTGCAGGCATGCAAGCTTGGCACTGGCCGTCGTTTTACAACGTCGTGACTGGGAAAACCTG  
GCGTTACCCAATTAATCGCCTTGCAGCACATCCCCCTTTCGCCAGCTGGCGTAATAGCGAAGAGGCCCGCACC  
GATCGCCCTTCCAACAGTTGCGCAGCCTGAATGGCGAATGGCGCTTTCCTGGTTTCCGGCACCAGAAGCGGT  
GCCGAAAGCTGGCTGGAGTGCATCTTCTGAGGCCGATACGGTCGTCGTCGCCCTCAAACCTGGCAGATGCAC  
GGTTACGATGCGCCATCTACACCAACGTAACCTATCCATTACGGTCAATCCGCCGTTTGTCCACGGAGAAT  
CCGACGGGTTGTTACTCGCTCACATTTAATGTTGATGAAAGCTGGCTACAGGAAGGCCAGACGCGAATTTTT  
TGATGGCGTTCCTATTGGTTAAAAAATGAGCTGATTTAACAAAAATTTAACCGAATTTTAAACAAAATATTAACG  
TTTACAATTTAAATATTTGCTTATACAATCTTCTGTTTTGGGGCTTTTCTGATTATCAACGGGGTACATATGA  
TTGACATGCTAGTTTTACGATTACCGTTCATCGATTCTTGTGTTGCTCCAGACTCTCAGGCAATGACCTGATAGC  
CTTTGTAGATCTCTAAAAATAGCTACCCTCTCCGGCATTATTTATCAGCTAGAACGGTTGAATATCATATTGAT  
GGTGATTTGACTGTCTCCGGCCTTCTCACCTTTTGAATCTTTACCTACACATTACTCAGGCATTGCATTTAAAA  
TATATGAGGGTCTAAAAATTTTTATCCTTGCCTTGAATAAAGGCTTCTCCCGCAAAAGTATTACAGGGTCATA  
ATGTTTTTGGTACAACCGATTAGCTTTATGCTCTGAGGCTTATTGCTTAATTTTGCTAATCTTTGCCTTGCCTG  
TATGATTTATTGGATGTTAATGCTACTACTATTAGTAGAATTGATGCCACCTTTTACGCTCGCGCCCAATGAA  
AATATAGCTAAAACAGGTTATTGACCATTTGCGAAATGTATCTAATGGTCAAACCTAAATCTACTCGTTTCGAGAAT  
TGGGAATCAAACGTTACATGGAATGAAACTTCCAGACACCGTACTTTAGTTGCATATTTAAAACATGTTGAGCTA  
CAGCACCAGATTCAGCAATTAAGCTCTAAGCCATCCGCAAAAATGACCTCTTATCAAAAGGAGCAATTAAGGT  
ACTCTCTAATCCTGACCTGTTGGAGTTTGTCTCCGGTCTGGTTTCGCTTTGAAGCTCGAATTAACGCGATATTT  
GAAGTCTTTCGGGCTTCTCTTAATCTTTTTGATGCAATCCGCTTTGCTTCTGACTATAATAGTCAGGGTAAAGAC  
CTGATTTTTGATTTATGGTCATTCTCGTTTTCTGAACTGTTTAAAGCATTGAGGGGGATTCAATGAATATTTATG  
ACGATTCCGAGTATTGGACGCTATCCAGTCTAAACATTTTACTATTACCCCTCTGGCAAACTTCTTTTGCAA  
AGCCTCTCGTATTTTGGTTTTTATCGTCGTCGGTAAACGAGGGTTATGATAGTGTGCTTACTATGCCTCGT  
AATTCCTTTTGGCGTTATGATCTGCATTAGTTGAATGTGGTATTCTAAATCTCAACTGATGAATCTTTCTACCT  
GTAATAATGTTGTTCCGTTAGTTCGTTTTATTAACGTAGATTTTTCTCCCAACGTCCTGACTGGTATAATGAGCC  
AGTTCTTAAAATCGCATAAGGTAATTCACAATGATTAAGTTGAAATTAACCATCTCAAGCCCAATTTACTACT  
CGTTCTGGTGTCTCGTCAGGGCAAGCCTTATCACTGAATGAGCAGCTTTGTTACGTTGATTTGGGTAATGAAT  
ATCCGGTCTTGTCAAGATTACTCTTGATGAAGGTCAGCCAGCCTATGCGCCTGGTCTGTACACCGTTCATCTGT  
CCTCTTCAAAGTTGGTCAGTTCCGTTCCCTTATGATTGACCGTCTGCGCCTCGTCCGGCTAAGTAACATGGAG  
CAGGTCGCGGATTTGACACAATTTATCAGGCGATGATACAAATCTCCGTTGACTTTGTTTTCGCGCTTGGTATA  
ATCGCTGGGGTCAAAGATGAGTGTTTTAGTGATTCTTTCGCTCTTTCGTTTTAGGTTGGTGCCTTCGTAGTG  
GCATTACGTATTTTACCGTTTAAATGAAAACCTCCTCATGAAAAAGTCTTTAGTCTCAAAGCCTCTGTAGCCGTT  
GCTACCCTCGTCCGATGCTGTCTTTCGCTGCTGAGGGTGACGATCCCGCAAAAGCGGCCTTTAACTCCCTGCAA  
GCCTCAGCGACCGAATATATCGGTTATGCGTGGGCGATGGTTGTTGCATTGTCGGCGCAACTATCGGTATCAA  
GCTGTTAAGAAATTCACCTCGAAAGCAAGCTGATAAACCAGATACAATTAAGGCTCCTTTTGGAGCCTTTTTTT  
TTGGAGATTTTCAACGTGAAAAAATTATTATTCGCAATTCCTTTAGTTGTTCTTTCTATTCTCACTCCGCTGAAA  
CTGTTGAAAGTTGTTTAGCAAAACCCATACAGAAAATTCATTTACTAACGTCGAAAGACGACAAAACCTTTA  
GATCGTTACGCTAACTATGAGGGTGTCTGTGGAATGCTACAGGCGTTGTAGTTTGTACTGGTGACGAAACTCA  
GTGTTACGGTACATGGGTTCTATTGGGCTTGTATCCCTGAAAATGAGGGTGGTGGCTCTGAGGGTGGCGGT  
TCTGAGGGTGGCGGTTCTGAGGGTGGCGGTAACCTCTGAGTACGGTGATACACCTATTCGGGCTATA  
CTTATATCAACCCTCTGACGGCACTTATCCGCTGGTACTGAGCAAAACCCGCTAATCCTAATCTTCTTGA

GGAGTCTCAGCCTCTTAATACTTTCATGTTTCAGAATAATAGGTTCCGAAATAGGCAGGGGGCATTAACTGTTT  
 ATACGGGCACTGTTACTCAAGGCACTGACCCCGTAAAACCTTATTACCAGTACACTCCTGTATCATCAAAGCCA  
 TGTATGACGCTTACTGGAACGGTAAATTCAGAGACTGCGCTTCCATTCTGGCTTAAATGAAGATCCATTCGTTT  
 GTGAATATCAAGGCCAATCGTCTGACCTGCTCAACCTCCTGTCAATGCTGGCGGCGCTCTGGTGGTGGTTCT  
 GGTGGCGGCTCTGAGGGTGGTGGCTCTGAGGGTGGCGGTTCTGAGGGTGGCGGCTCTGAGGGAGGCGGTTT  
 CGGTGGTGGCTCTGGTTCCGGTGATTTTGATTATGAAAAGATGGCAAACGCTAATAAGGGGGCTATGACCGAA  
 AATGCCGATGAAAACGCGCTACAGTCTGACGCTAAAGGCAAACCTTATTCTGTCGCTACTGATTACGGTGCTGC  
 TATCGATGGTTTCATTGGTGACGTTTCCGGCCTTGCTAATGGTAATGGTGTACTGGTGATTTTCTGGCTCTAA  
 TTCCCAAATGGCTCAAGTCGGTGACGGTGATAATTCACCTTAAATGAATAATTTCCGTCATATTTACCTTCCCTC  
 CCTCAATCGGTTGAATGTCGCCCTTTTGTCTTTAGCGCTGGTAAACCATATGAATTTTCTATTGATTGTGACAAAA  
 TAACTTATTCCGTGGTGTCTTTGCGTTTCTTTATATGTTGCCACCTTATGTATGATTTTCTACGTTTGTAAAC  
 ATACTGCGTAATAAGGAGTCTTAATCATGCCAGTCTTTTGGGATTCCGTTATTATTGCGTTTCTCGGTTTCT  
 TCTGGTAACTTTGTTCCGGCTACTGCTTACTTTTCTAAAAGGGCTTCGGTAAAGATAGCTATTGCTATTTCTATTG  
 TTTCTTGTCTTATTATTGGGCTAACTCAATCTTGTGGGTTATCTCTGATATTAGCGCTCAATTACCCTCTGA  
 CTTTGTTCAGGGTGTTCAGTTAATTCTCCCGTCTAATGCGCTTCCCTGTTTTTATGTTATTCTCTCTGTAAAGGCTG  
 CTATTTTCATTTTGACGTTAAACAAAAAATCGTTTCTTATTGGATTGGGATAAATAATATGGCTGTTTATTTTG  
 TAACTGGCAAATTAGGCTCTGGAAGACGCTCGTTAGCGTTGGTAAGATTCAGGATAAAATTGTAGCTGGGTG  
 CAAAATAGCAACTAATCTTGATTTAAGGCTTCAAACCTCCCGCAAGTCGGGAGGTTTCGCTAAAACGCTCGCG  
 TTCTTAGAATACCGGATAAGCCTTCTATATCTGATTTGCTTCTATTGGGCGCGGTAATGATTCCTACGATGAAA  
 AAAAAACGGCTTGCTTGTCTCGATGAGTGCAGTACTTGGTTAATACCCGTTCTTGAATGATAAGGAAAGA  
 CAGCCGATTATTGATTGGTTTCTACATGCTGTAATTAGGATGGGATATTATTTTCTTGTTCAGGACTTATCTA  
 TTGTTGATAAACAGGCGCGTTCTGCATTAGCTGAACATGTTGTTTATTGTCGTCGCTGGACAGAATTACTTTAC  
 CTTTTGTCGTACTTTATATTCTTATTACTGGCTCGAAAATGCCTCTGCCTAAATTACATGTTGGCGTTGTTAA  
 ATATGGCGATTCTCAATTAAGCCCTACTGTTGAGCGTTGGCTTATACTGGTAAGAATTTGTATAACGCATATGA  
 TACTAAACAGGCTTTTTCTAGTAATTATGATTCCGGTGTATTCTTATTAAACGCCTATTTATCACACGGTCGG  
 TATTTCAAACCATTAATAATTAGGTCAGAAGATGAAATTAATAAAATATATTTGAAAAAGTTTTCTCGCGTTCTTT  
 GTCTTGCATTGGATTTGCATCAGCATTACATATAGTTATATAACCCAACCTAAGCCGAGGTTAAAAAGGTA  
 GTCTCTCAGACCTATGATTTTGATAAATCACTATTGACTCTTCTCAGCGTCTTAATCTAAGCTATCGCTATGTTT  
 CAAGGATTCTAAGGGAAAATTAATTAATAGCGACGATTTACAGAAGCAAGGTTATTCACATCATATATTGATT  
 TATGTACTGTTTCCATTAATAAAGGTAATTCAAATGAAATTGTTAAATGTAATTAATTTGTTTTCTTGTATGTTG  
 TTTTATCATCTTCTTTGCTCAGGTAATTGAAATGAAATTCGCCTCTGCGGATTTGTAACCTGGTATTCAA  
 GCAATCAGGCGAATCCGTTATTGTTTCTCCGATGTAAGGTAATGTTACTGTAATTCATCTGACGTTAAACC  
 TGAAAATCTACGAATTTCTTATTCTGTTTACGTGCTAATAATTTGATATGGTTGGTTCAATTCCTTCCATAA  
 TTCAGAAGTATAATCCAAACAATCAGGATTATATTGATGAATTGCCATCATCTGATAATCAGGAATATGATGATA  
 ATCCGCTCCTTCTGGTGGTTTCTTGTCCGCAAAATGATAATGTTACTCAAACCTTTAAAATTAATAACGTTTCG  
 GGCAAAGGATTTAATACGAGTTGTGCAATTGTTGTAAAGTCAATACTTCTAAATCCTCAAATGTATTATCTATT  
 GACGGCTCAATCTATTAGTTGTTAGTGCACCTAAAGATATTTAGATAACCTTCTCAATTCCTTCTACTGTTG  
 ATTTGCCAACTGACCAGATATTGATTGAGGGTTGATATTTGAGGTTTCAGCAAGGTGATGCTTTAGATTTTCTAT  
 TTGCTGCTGGCTCTCAGCGTGGCACTGTTGCAGGCGGTGTTAATACTGACCGCTCACCTCTGTTTTATCTCTG  
 CTGGTGGTTTCGTTCCGATTTTTAATGGCGATGTTTGGGGCTATCAGTTGCGCATTAAAGACTAATAGCCATT  
 CAAAATATTGTCTGTGCCACGTATTCTTACGCTTTCAGGTGAGAAGGGTCTATCTCTGTTGGCCAGAATGTCC  
 CTTTTACTGGTCTGTGACTGGTGAATCTGCCAATGTAATAATCCATTTACAGACGATTGAGCGTCAAAATG  
 TAGGATTTCCATGAGCGTTTTCTGTTGCAATGGCTGGCGGTAATATTGTTCTGGATATTACCAGCAAGGCCG  
 ATAGTTGAGTTCTTACTCAGGCAAGTGATGTTACTAATCAAAGAAGTATTGCTACAACGGTTAATTTGC  
 GTGATGGACAGACTTTTTACTCGGTGGCCTCACTGATTATAAAAACACTTCTCAAGATTCTGGCGTACCGTTCC  
 TGTCTAAAATCCCTTAAATCGGCCTCTGTTAGCTCCCGCTCTGATTCCAACGAGGAAAGCACGTTATACGTGC  
 TCGTCAAAGCAACCATAGTACGCGCCCTGTAGCGGCGCATTAAAGCGCGGCGGGTGTGGTGGTTACGCGCAGC  
 GTGACCGCTACACTTGCCAGCGCCCTAGCGCCCGCTCCTTTCGCTTC

**Oligo name      DNA sequence of staples for DNA origami triangle (5' - 3').**

- R1      CGGGGTTTCTCAAGAGAAGGATTTTGAATTA
- R2      AGCGTCATGTCTCTGAATTTACGACTACCTT
- R3      TTCATAATCCCCTTATTAGCGTTTTTCTTACC
- R4      ATGGTTTATGTCACAATCAATAGATATTAAC

R5 TTTGATGATTAAGAGGCTGAGACTTGCTCAGTACCAGGCG  
R6 CCGGAACCCAGAATGGAAAGCGCAACATGGCT  
R7 AAAGACAACATTTTCGGTCATAGCCAAAATCA  
R8 GACGGGAGAATTAACCTCGGAATAAGTTTATTTCCAGCGCT  
R9 GATAAGTGCCGTCGAGCTGAAACATGAAAGTATACAGGAG  
R10 TGTACTGGGGATCTTCATTAAGCAGAGCCAC  
R11 CACCGGAAAGCGCGTTTTTCATCGGAAGGGCGA  
R12 CATTCAACAAACGCAAAGACACCAGAACCCTGAACAAA  
R13 TTTAACGGTTCGGAACCTATTATTAGGGTTGATATAAGTA  
R14 CTCAGAGCATATTCACAAACGAATTAATAAGT  
R15 GGAGGGAAATTTAGCGTCAGACTGTCCGCCTCC  
R16 GTCAGAGGGTAATTGATGGCAACATATAAAAGCGATTGAG  
R17 TAGCCCGGAATAGGTGAATGCCCCCTGCCTATGGTCAGTG  
R18 CCTTGAGTCAGACGATTGGCCTTGCGCCACCC  
R19 TCAGAACCCAGAATCAAGTTTGCCGGTAAATA  
R20 TTGACGGAAATACATACATAAAGGGCGCTAATATCAGAGA  
R21 CAGAGCCAGGAGGTTGAGGCAGGTAACAGTGCCCG  
R22 ATTAAGGCCGTAATCAGTAGCGAGCCACCCT  
R23 GATAACCCACAAGAATGTTAGCAAACGTAGAAAATTATTC  
R24 GCCGCCAGCATTGACACCACCCTC  
R25 AGAGCCGCACCATCGATAGCAGCATGAATTAT  
R26 CACCGTCACCTTATTACGCAGTATTGAGTTAAGCCCAATA  
R27 AGCCATTTAAACGTCACCAATGAACACCAGAACCA  
R28 ATAAGAGCAAGAAACATGGCATGATTAAGACTCCGACTTG  
R29 CCATTAGCAAGGCCGGGGGAATTA  
R30 GAGCCAGCGAATACCCAAAAGAACATGAAATAGCAATAGC  
R31 TATCTTACCGAAGCCCAAACGCAATAATAACGAAAATCACCAG  
R32 CAGAAGGAAACCGAGGTTTTTAAGAAAAGTAAGCAGATAGCCG  
R33 CCTTTTTTCATTTAACAATTTTCATAGGATTAG  
R34 TTTAACCTATCATAGGTCTGAGAGTTCCAGTA  
R35 AGTATAAAATATGCGTTATACAAAGCCATCTT  
R36 CAAGTACCTCATTCCAAGAACGGGAAATTCAT  
R37 AGAGAATAACATAAAAAACAGGGAAGCGCATTAA  
R38 AAAACAAAATTAATTAATGGAACAGTACATTAGTGAAT  
R39 TTATCAAACCGGCTTAGGTTGGGTAAAGCCTGT  
R40 TTAGTATCGCCAACGCTCAACAGTCGGCTGTC  
R41 TTTCTTAGCACTCATCGAGAACAATAGCAGCCTTTACAG  
R42 AGAGTCAAAAATCAATATATGTGATGAAACAAAACATCAAG  
R43 ACTAGAAATATATACTATATGTACGCTGAGA  
R44 TCAATAATAGGGCTTAATTGAGAATCATAATT  
R45 AACGTCAAAAATGAAAAGCAAGCCGTTTTTATGAAACCAA  
R46 GAGCAAAAAGAAGATGAGTGAATAACCTTGCTTATAGCTTA  
R47 GATTAAGAAATGCTGATGCAAATCAGAATAAA  
R48 CACCGGAATCGCCATATTTAACAAAATTTACG  
R49 AGCATGTATTTTCATCGTAGGAATCAAACGATTTTTTTGTTT  
R50 ACATAGCGCTGTAATCGTCGCTATTCATTTCAATTACCT  
R51 GTTAAATACAATCGCAAGACAAAGCCTTGAAA  
R52 CCCATCCTCGCCAACATGTAATTTAATAAGGC  
R53 TCCCAATCCAAATAAGATTACCGCGCCAATAAATAATAT  
R54 TCCCTTAGAATAACGCGAGAAAACCTTTTACCGACC  
R55 GTGTGATAAGGCAGAGGCATTTTCAGTCCTGA  
R56 ACAAGAAAGCAAGCAAATCAGATAACAGCCATATTATTTA  
R57 GTTTGAATTTCAAAATATATTTTAG  
R58 AATAGATAGAGCCAGTAATAAGAGATTTAATG  
R59 GCCAGTTACAAAATAATAGAAGGCTTATCCGGTTATCAAC  
R60 TTCTGACCTAAAATATAAAGTACCGACTGCAGAAC  
R61 GCGCCTGTTATTCTAAGAACGCGATTCCAGAGCCTAATTT

R62 TCAGCTAAAAAAGGTAAAGTAATT  
R63 ACGCTAACGAGCGTCTGGCGTTTTAGCGAACCCAACATGT  
R64 ACGACAATAAATCCCGACTTGCGGGAGATCCTGAATCTTACCA  
R65 TGCTATTTTGCACCCAGCTACAATTTTGTGTTGAAGCCTTAAA  
L1 TCATATGTGTAATCGTAAACTAGTCATTTTC  
L2 GTGAGAAAATGTGTAGGTAAAGATACAACCTT  
L3 GGCATCAAATTTGGGGCGGAGCTGAGTTAAA  
L4 TTCGAGCTAAGACTTCAAATATCGCGGAACGA  
L5 ACAGTCAAAGAGAATCGATGAACGACCCCGTTGATAATC  
L6 ATAGTAGTATGCAATGCCTGAGTAGGCCGGAG  
L7 AACCAGACGTTTAGCTATATTTTCTTCTACTA  
L8 GAATACCACATTCAACTTAAGAGGAAGCCCGATCAAAGCG  
L9 AGAAAAGCCCCAAAAAGAGTCTGGAGCAAACAATCACCAT  
L10 CAATATGACCCTCATATATTTTAAAGCATTAA  
L11 CATCCAATAAATGGTCAATAACCTCGGAAGCA  
L12 AACTCCAAGATTGCATCAAAAAGATAATGCAGATACATAA  
L13 CGTTCTAGTCAGGTCATTGCCTGACAGGAAGATTGTATAA  
L14 CAGGCAAGATAAAAAATTTTGAATATTCAAC  
L15 GATTAGAGATTAGATACATTTTCGCAAATCATA  
L16 CGCCAAAAGGAATTACAGTCAGAAGCAAAGCGCAGGTCAG  
L17 GCAAATATTTAAATTGAGATCTACAAGGCTACTGATAAA  
L18 TTAATGCCTTATTTCAACGCAAGGGCAAAGAA  
L19 TTAGCAAATAGATTTAGTTTGACCAGTACCTT  
L20 TAATTGCTTTACCCTGACTATTATGAGGCATAGTAAGAGC  
L21 ATAAAGCCTTTGCGGGAGAAGCCTGGAGAGGGTAG  
L22 TAAGAGGTCAATTCTGCGAACGAGATTAAGCA  
L23 AACACTATCATAACCCATCAAAAATCAGGTCTCCTTTTGA  
L24 ATGACCCTGTAATACTTCAGAGCA  
L25 TAAAGCTATGTAACAGTTGATTCCCATTTTTG  
L26 CGGATGGCACGAGAATGACCATAATCGTTTACCAGACGAC  
L27 TAATTGCTTGAAGTTTCATTCCAATCGGTTGTA  
L28 GATAAAAACCAAAATATAAACAGTTCAGAAATTAGAGCT  
L29 ACTAAAGTACGGTGTGCAATCTGG  
L30 TGCTGTAGATCCCCCTCAAATGCTGCGAGAGGCTTTTGCA  
L31 AAAGAAGTTTTGCCAGCATAAATATTCATTGACTCAACATGTT  
L32 AATACTGCGAATCGTAGGGGTAATAGTAAAATGTTTAGACT  
L33 AGGGATAGCTCAGAGCCACCACCCCATGTCAA  
L34 CAACAGTTTATGGGGTTTTGCTAATCAAAGG  
L35 GGCCGCTTCGCTGAGGCTTGCAGGGAAAAGGT  
L36 GGCGCAGACTCCATGTTACTTAGCCGTTTTAA  
L37 ACAGGTAGAAAAGATTCATCAGTTGAGATTTAG  
L38 CCTCAGAACCGCCACCCAAGCCCAATAGGAACGTAAATGA  
L39 ATTTTCTGTCAGCGGAGTGAGAATAACCGATA  
L40 TATTCGGTTTGCGGGATCGTCACCCGAAATCC  
L41 GCGACCTGCGGTCAATCATAAGGGACGGAACAACATTATT  
L42 AGACGTTACCATGTACCGTAACCCCCTCAGAACCGCCAC  
L43 CCACGCATAGAAAGGAACAACATAAGTCTTTCC  
L44 AATTGTGTCTCAGCAGCGAAAGACACCATCGC  
L45 TTAATAAAACGAACTAAACCGAACTGACCAACGCCTGATA  
L46 AGGTTTAGTACCGCCATGAGTTTCGTCACCAGGATCTAAA  
L47 GTTTTGTCAAGGAATTGCGAATAATGCCGACAA  
L48 TGACAACAAGCATCGGAACGAGGGGGAGATTT  
L49 GTATCATCTTTGAAAGAGGACAGAGGAAGAAAAATCTACG  
L50 AGCGTAACTACAACTACAACGCCTATCACCGTACTCAGG  
L51 ATAGTTGCAATTTTTTACGTTGATCATAGTT  
L52 AGTACAACACTAGCAACGGCTACAGATGATACCG  
L53 ACCAGTCAGGACGTTGTGAACGGTGTACAGACCGAAACAA

L54 ACAGACAACCCAAATCTCCAAAAAAAAAATTTCTT  
 L55 AAACAGCTGGCTTTGAGGACTAAAGCGATTAT  
 L56 ACCAAGCGCAGGCGCATAGGCTGGAGAACTGGCTCATTAT  
 L57 TCGAGGTGAGGCTCCAAAAGGAGC  
 L58 GACCCCAGACTTTTTTCATGAGGAGCTTGCTT  
 L59 ACCTTATGCGATTTTACTGACCTTCATCAAGATCATCTTT  
 L60 TCGGTTTATCAAGTTTCCATTAAACGGGAATACAC  
 L61 TAAAACACGTAATCTTGACAAGAATTAATCATTGTGAATT  
 L62 AGGCGAAAGTAAAATACGTAATGC  
 L63 TGGTTTAAATTTCAACTCCGGATATTCATTACCAACGAAAG  
 L64 CACCAACCTAACAAATCAACGTAACAATAAATTGGGCTTGAGA  
 L65 CCCTGACGAGAACCAGAACGAGTAGAGCTGCTCATTCAAGTG  
 B1 ATCGGGAGATATACAGTAACAGTACAAATAATT  
 B2 CCTGATTAAGGAGCGGAATTATCTCGGCCTC  
 B3 GGCAAATCACCTCAATCAATATCTGCAGGTGCA  
 B4 CGACCAGTACATTGGCAGATTCACCTGATTGC  
 B5 TGGCAATTTTAAACGTCAGATGAAAACAATAACGGATTGCG  
 B6 AAGGAATTACAAAGAAACCACCAGTCAGATGA  
 B7 GGACATTCACCTCAAATATCAAACACAGTAGA  
 B8 TTGACGAGCACGTATACTGAAATGGATTATTTAATAAAAAG  
 B9 CCTGATTGCTTTGAATTGCGTAGATTTTCAGGCATCAATA  
 B10 TAATCCTGATTATCATTGCGGAGAGGAAGG  
 B11 TTATCTAAAGCATCACCTTGCTGATGGCCAAC  
 B12 AGAGATAGTTTGACGCTCAATCGTACGTGCTTTCCTCGTT  
 B13 GATTATACACAGAAATAAAGAAATACCAAGTTACAAAATC  
 B14 TAGGTGCATAAAAAGTTTGAGTAACATTGTTTG  
 B15 TGACCTGACAAATGAAAAATCTAAAATATCTT  
 B16 GGAATCAGAGCGGGAGATGGAAATACCTACATAACCCTTC  
 B17 GCGCAGAGGCGAATTAATTATTAGCACGTAAATTCTGAAT  
 B18 TATGGAAGCGAACGTTATTAATTTCTAACAAAC  
 B19 TAATAGATCGCTGAGAGCCAGCAGAAGCGTAA  
 B20 GAATACGTAACAGGAAAAACGCTCCTAACAGGAGGCCGA  
 B21 TCAATAGATATTAATCCTTTGCCGAATTGAACCA  
 B22 CAATATTTGCCTGCAACAGTGCCATAGAGCCG  
 B23 TTAAAGGGATTTTAGATACCGCCAGCCATTGCGGCACAGA  
 B24 ACAATTCGACAACCTCGTAATACAT  
 B25 TTGAGGATGGTCAGTATTAACACCTTGAATGG  
 B26 CTATTAGTATATCCAGAACAATATCAGGAACGGTACGCCA  
 B27 CGCGAACTAAAACAGAGGTGAGGCTTAGAAGTATT  
 B28 GAATCTTGAGAAAGTGTATCGGCCTTGCTGGTACTTTAATG  
 B29 ACCACCAGCAGAAGATGATAGCC  
 B30 CTAAAACATTAGAAGAACTCAAACCTTTTATAATCAGTGAG  
 B31 GCCACCGAGTAAAAGAACATCACTTGCCCTGAGCGCCATTAATA  
 B32 TCTTTGATTAGTAATAGTCTGTCCATCACGCAAATTAACCGTT  
 B33 CGCGTCTGATAGGAACGCCATCAACTTTTAC  
 B34 AGGAAGATGGGGACGACGACCGTAATCATATT  
 B35 CTCTAGAGCAAGCTTGATGCCTGGTCAGTT  
 B36 CCTTACCCGCGAGACGGGCAACAGCAGTCACA  
 B37 CGAGAAAGGAAGGGGAAGCGTACTATGGTTGCT  
 B38 GCTCATTTTTTAACCAGCCTTCTGTAGCCAGGCATCTGC  
 B39 CAGTTTGACGCACTCCAGCCAGCTAAACGACG  
 B40 GCCAGTGCATCCCGGGTACCGAGTTTTTCT  
 B41 TTTCACCAGCCTGGCCCTGAGAGAAAGCCGGCGAACGTGG  
 B42 GTAACCGTCTTTCATCAACATTAATAATTTTGTAAATCA  
 B43 ACGTTGTATTCCGGCACCGCTTCTGGCGCATC  
 B44 CCAGGGTGGCTCGAATTCGTAATCCAGTCACG  
 B45 TAGAGCTTGACGGGGAGTTGCAGCAAGCGGTCATTGGGCG



B46 GTTAAAATTCGCGTTAATGTGAGCGAGTAACATACGTTGG  
 B47 TGTAGATGGGTGCCGAAACCAGGAACGCCAG  
 B48 GGTTTTCCATGGTCATAGCTGTTTGAGAGGCG  
 B49 GTTTGCGTCACGCTGGTTTGCCCAAGGGAGCCCCGATT  
 B50 GGATAGGTACCCGTCGGATTCTCCTAAACGTTAATATTTT  
 B51 AGTTGGGTCAAAGCGCCATTCGCCCCGTAATG  
 B52 CGCGCGGGCCTGTGTGAAATTGTTGGCGATTA  
 B53 CTAATCGGAACCCTAAGCAGGCGAAAATCCTTCGGCCAA  
 B54 CGGCGGATTGAATTCAGGCTGCGCAACGGGGGATG  
 B55 TGCTGCAAATCCGCTCACAATCCCAGCTGCA  
 B56 TTAATGAAGTTTGATGGTGGTTCCGAGGTGCCGTAAAGCA  
 B57 TGGCGAAATGTTGGGAAGGGCGAT  
 B58 TGTCGTGCACACAACATACGAGCCACGCCAGC  
 B59 CAAGTTTTTTGGGGTCGAAATCGGCAAAATCCGGGAAACC  
 B60 TCTTCGCTATTGGAAGCATAAAGTGTATGCCCGCT  
 B61 TTCCAGTCCTTATAAATCAAAAGAGAACCATCACCCAAAT  
 B62 GCGCTCACAAGCCTGGGGTGCCTA  
 B63 CGATGGCCCACTACGTATAGCCCGAGATAGGGATTGCGTT  
 B64 AACTCACATTATTGAGTGTGTTCCAGAAACCGTCTATCAGGG  
 B65 ACGTGGACTCCAACGTCAAAGGGCGAATTTGGAACAAGAGTCC  
 LINKER-L1R TGTAGCATTCTTTTTATAAACAGTT  
 LINKER-L2R CTTTAATTGTATTCCACCAGAGCC  
 LINKER-L3R CACTACGAAGGTTAGCACCATTA  
 LINKER-L4R AATAAGGCTTGAACAAAGTTAC  
 LINKER-R1B TTAATTAATTTTTTACCATATCAAA  
 LINKER-R2B TTAATTTTCATCTTAGACTTTACAA  
 LINKER-R3B CTGTCCAGACGTATACCGAACGA  
 LINKER-R4B TCAAGATTAGTGTAGCAATACT  
 LINKER-B1L GTGGGAACAAATTTCTATTTTTGAG  
 LINKER-B2L CGGTGCGGGCCTTCCAAAAACATT  
 LINKER-B3L ATGAGTGAGCTTTTAAATATGCA  
 LINKER-B4L ACTATTAAGAGGATAGCGTCC

**Oligo name DNA sequences of staples for DNA origami rectangle (5' - 3').**

RECT\_1 TCACGTTGAAAATCTCGCGAATAATAATTTTT  
 RECT\_2 AGGAAGTTTCCATTAATAAAGACTTTTTTCATG  
 RECT\_3 CAGGCGCATAGGCTGGTGAACGGTGTACAGAC  
 RECT\_4 GGTAGAAAGATTCATCGAACAACATTATTACA  
 RECT\_5 TGACCATAAATCAAAAGTTTCAGAAAACGAGAA  
 RECT\_6 GTGTCTGGAAGTTTCAATGCAACTAAAGTACG  
 RECT\_7 TTTTGCGGGAGAAGCCTATGACCCTGTAATAC  
 RECT\_8 GTCAATCATATGTACCATCGTAAAACACTAGCAT  
 RECT\_9 GTGTAGATGGGCGCATGGGATAGGTCACGTTG  
 RECT\_10 AGTGCCAAGCTTGCATTTGTAACGACGGCC  
 RECT\_11 TATTGGGCGCCAGGGTGGAGAGGCGGTTTTCG  
 RECT\_12 TGGCCCACTACGTGAACCGTCTATCAGGGCGA  
 RECT\_13 TCTTTTCACTCAAAGGGCGAAAAACCATCA  
 RECT\_14 AGGTGCACTTCGGCCAACGCGGGGTTTTT  
 RECT\_15 CGTGCATCTTTCCAGTCACGACGGCCTGC  
 RECT\_16 GATAATCAGCGGATTGACCGTAATCGTAAC  
 RECT\_17 TCAACGCAAAATCGATGAACGGTACCGGTT  
 RECT\_18 ATAACAGTTTTGTACCAAAAACATTTTATT  
 RECT\_19 TCTTTACCCCAACATGTTTTAAATTTCCAT  
 RECT\_20 GATTTAGGACAAATGCTTTAAACAATCAGG

RECT\_21 TTCATCAAGTAAAACGAACTAACGAGTTGA  
RECT\_22 AAAATACGTTTGAAAGAGGACAGACTGACC  
RECT\_23 AAAGGCTCCAGAGGCTTTGAGGACACGGGT  
RECT\_24 AGAAAGGAACAATAAGGAATTCAAAAA  
RECT\_25 CCCAAATCAAGTTTTTTGGGGTCGAAACGTGGA  
RECT\_26 CTCCAACGCAGTGAGACGGGCAACCAGCTGCA  
RECT\_27 TTAATGAACTAGAGGATCCCCGGGGGTAACG  
RECT\_28 CCAGGGTTGCCAGTTTGAGGGGACCCGTGGGA  
RECT\_29 ACAAACGAAAAGCCCCAAAAACTGGAGCA  
RECT\_30 AACAAGAGGGATAAAAATTTTAGCATAAAGC  
RECT\_31 TAAATCGGGATTCCAATTCTGCGATATAATG  
RECT\_32 CTGTAGCTTGACTATTATAGTCAGTTCATTGA  
RECT\_33 ATCCCCCTATACCACATTCAACTAGAAAAATC  
RECT\_34 TACGTTAAAGTAATCTTGACAAGAACCGAACT  
RECT\_35 GACCAACTAATGCCACTACGAAGGGGGTAGCA  
RECT\_36 ACGGCTACAAAAGGAGCCTTTAATGTGAGAAT  
RECT\_37 TGCCCTTCAGAGTCCACTATTAAGGGTGCCG  
RECT\_38 CTCGAATTCGGGAAACCTGTCGTGCAGCTGAT  
RECT\_39 GTATCGGCCGCAAGGCGATTAAGTTTACCGAG  
RECT\_40 TGTATAAGCCAACCCGTCGGATTCTGACGACA  
RECT\_41 ATATATTTTGCATTGCCTGAGAGTGGAAGAT  
RECT\_42 AGATTTAGTCAATAAAGCCTCAGAGAACCCTC  
RECT\_43 GCGGATTGCAGAGCTTAATTGCTGAAACGAGT  
RECT\_44 TACATAACGGGAATCGTCATAAATAAAGCAAA  
RECT\_45 ATTCATTACGTCAGGACGTTGGGAAATGCAGA  
RECT\_46 CTA AACGAGGTCAATCATAAGGGAACCGGAT  
RECT\_47 GTTTATCAGGACAGCATCGGAACGACACCAAC  
RECT\_48 CAAC TTTCAACAGTTTCAGCGGATGTATCG  
RECT\_49 TAAAGCACTAAATCGGAACCTAATCCAGTTT  
RECT\_50 GGAACAACCGCCTGGCCCTGAGGCCCGCTT  
RECT\_51 TCCAGTCGTAATCATGGTCATAAAAAGGGGG  
RECT\_52 ATGTGCTTCAGGAAGATCGCACAAATGTGAG  
RECT\_53 CGAGTAAAAATATTTAAATTGTTACAAAGG  
RECT\_54 CTATCAGAAATGCAATGCCTGAATTAGCAA  
RECT\_55 AATTAAGTTGACCATTAGATACTTTTGCGG  
RECT\_56 ATGGCTTATCAAAAAGATTAAGAGCGTCCA  
RECT\_57 ATACTGCCCAAAAGGAATTACGTGGCTCAT  
RECT\_58 TATACCACCAATCAACGTAACGAACGAGG  
RECT\_59 CGCAGACAAGAGGCAAAAGAATCCCTCAGC  
RECT\_60 AGCGAAACTTGCTTTGAGGTTGTTGCTAAA  
RECT\_61 CAGCAAGCGTAGGGTTGAGTGTGTAGGGAGC  
RECT\_62 CCTGTGTGATTGCGTTGCGCTCACTAGAGTTG  
RECT\_63 AGCTTTCCGATTACGCCAGCTGGCGGCTGTTT  
RECT\_64 AATATTTTGGCTTTCATCAACATTATCCAGCC  
RECT\_65 GTAGGTAACTATTTTGGAGAGATCAAACGTT  
RECT\_66 AAATGGTCAACAGGCAAGGCAAAGAGTAATGT  
RECT\_67 CCGAAAGACTTTGATAAGAGGTCATATTTCCG  
RECT\_68 GTAAGAGCAAATGTTTAGACTGGATAGGAAGC  
RECT\_69 CTCATTAGATGCGATTTTAAAGAACAGGCATA  
RECT\_70 AACACTCATCCATGTTACTTAGCCGAAAGCTG  
RECT\_71 TAAACAGCTTTTTGCGGGATCGTCAACACTAA  
RECT\_72 TAAATGAATTTTCTGTATGGGATTAATTTCT  
RECT\_73 CCCCATTAGAGCTTGACGGGGAAAAAGAATA  
RECT\_74 GCCCGAGAGTCCACGCTGTTTGCAGCTAACT  
RECT\_75 CACATTAATAATTGTTATCCGCTCATGCGGGCC  
RECT\_76 TCTTCGCTGCACCGCTTCTGGTGCGGCCTTCC  
RECT\_77 TGTAGCCATTAATAATCGCATTAAATGCCGGA

RECT\_78 GAGGGTAGGATTCAAAGGGTGAGACATCCAA  
RECT\_79 TAAATCATATAACCTGTTTAGCTAACCTTTAA  
RECT\_80 TTGCTCCTTTCAAATATCGCGTTTGAGGGGGT  
RECT\_81 AATAGTAAACACTATCATAACCCTCATTGTGA  
RECT\_82 ATTACCTTTGAATAAGGCTTGCCCAATCCGC  
RECT\_83 GACCTGCTCTTTGACCCCCAGCGAGGGAGTTA  
RECT\_84 AAGGCCGCTGATACCGATAGTTGCGACGTTAG  
RECT\_85 AGGCGAAAAATCCCTTATAAATCAAGCCGG  
RECT\_86 CACACAACAGGTGCCTAATGAGTGCCAGC  
RECT\_87 CCAGGCAAAGGGAAGGGCGATCGGCAATTC  
RECT\_88 GTTAAATCAAATAATTGCGCTCTCGGAAA  
RECT\_89 CGGAGACAGCTAGCTGATAAATTAATTTTT  
RECT\_90 CATTGGGGATAGTAGTAGCATTAAAAGGC  
RECT\_91 GAGCTTCAATCAGGATTAGAGAGTTATTTT  
RECT\_92 CCAGACGACAAAGAAGTTTTGCCATAATTC  
RECT\_93 GAAACACCAAATTTCAACTTAAATCGTTTA  
RECT\_94 CAAGCGCGATGATAAATTGTGTCGTGACGA  
RECT\_95 AATGACAACCTCGCTGAGGCTGCATTATAC  
RECT\_96 TCTAAAGTTTTGTCGTCTTTCCAGCCGAC  
RECT\_97 CGAACGTGGCGAGAAAGGAAGGGAAACAGTA  
RECT\_98 TCGGCAAATCCTGTTTGATGGTGGACCCTCA  
RECT\_99 AAGCCTGGTACGAGCCGGAAGCATAGATGAT  
RECT\_100 CAACTGTTGCGCCATTCGCCATTCAAACATC  
RECT\_101 GCCATCAAGCTCATTTTTTAACCACAAATCC  
RECT\_102 CAACCGTTTCAAATCACCATCAATTCGAGCC  
RECT\_103 TTCTACTACGCGAGCTGAAAAGTTACCGCG  
RECT\_104 CCAACAGGAGCGAACCAGACCGGAGCCTTTA  
RECT\_105 CTTTTGCAGATAAAAAACAAAATAAAGACTC  
RECT\_106 GATGGTTTGAACGAGTAGTAAATTTACCATT  
RECT\_107 TCATCGCCAACAAAGTACAACGGACGCCAGC  
RECT\_108 ATATTCGGAACCATCGCCACGCAGAGAAGG  
RECT\_109 ATCAATATCGAACCTCAAATATCAATTCGAAA  
RECT\_110 GGCAATTCACATATTCTGATTATCAAAGTGTA  
RECT\_111 AAGAAAACAAAGAAGATGATGAAACAGGCTGCG  
RECT\_112 AATCGCAAGTATGTAAATGCTGATGATAGGAAC  
RECT\_113 AGTAATAAGTTAGGCAGAGGCATTTATGATATT  
RECT\_114 CCCAATAGCTCATCGTAGGAATCATGGCATCAA  
RECT\_115 CAGAGAGAAAAAATGAAAATAGCAAGCAAATC  
RECT\_116 CTTATTACGAAGAACTGGCATGATTGCGAGAGG  
RECT\_117 AGCAAGGCCTCACCAGTAGCACCATGGGCTTGA  
RECT\_118 ATTGACAGGCCACCACCAGAGCCGCGATTTGTA  
RECT\_119 ATTAGGATTGGCTGAGACTCCTCAATAACCGAT  
RECT\_120 TCCACAGACAGCCCTCATAGTTAGCGTAACGA  
RECT\_121 ATAAAAGGGACATTCTGGCCAACAAAGCATC  
RECT\_122 ACCTTGCTTGGTCAGTTGGCAAAGAGCGGA  
RECT\_123 ATTATCATTCAATATAATCCTGACAATTAC  
RECT\_124 CTGAGCAAAAATTAATTACATTTTGGGTTA  
RECT\_125 TATAACTAACAAAGAACGCGAGAACGCCAA  
RECT\_126 CATGTAATAGAATATAAAGTACCAAGCCGT  
RECT\_127 TTTTATTTAAGCAAATCAGATATTTTTTGT  
RECT\_128 TTAACGTCTAACATAAAAACAGGTAACGGGA  
RECT\_129 ATACCCAACAGTATGTTAGCAAATTAGAGC  
RECT\_130 CAGCAAAAGGAAACGTCACCAATGAGCCGC  
RECT\_131 CACCAGAAAGGTTGAGGCAGGTCATGAAAG  
RECT\_132 TATTAAGAAGCGGGGTTTTGCTCGTAGCAT  
RECT\_133 TTGAAAGGAGCAAATGAAAAATCTAGAGATAG  
RECT\_134 GATTATACTAAGAAACCACAGAAAGTCAACAG

RECT\_135 TCATTTGAAGGCGAATTATTCATTTTTGTTG  
RECT\_136 TTCAAATATAACCTCCGGCTTAGGTAACAATT  
RECT\_137 GGTAAGTAATCGCCATATTTAACAAAACCTT  
RECT\_138 TTATCCGGTCTCATCGAGAACAAGCGACAAAA  
RECT\_139 ATTAGACGGCCAAATAAGAAACGATAGAAGGC  
RECT\_140 AATACATACCGAGGAAACGCAATAAGAAGCGC  
RECT\_141 TCGATAGCATTGAGCCATTTGGGAACGTAGAA  
RECT\_142 TGGCCTTGAAGAGCCACCACCTCAGAAACCA  
RECT\_143 GGCGGATAACCTATTATTCTGAAACAGACGAT  
RECT\_144 TCACCAGTACAACTACAACGCCTAGTACCA  
RECT\_145 AACCTTCTGACCTGAAAGCGTAAGACGCTGAG  
RECT\_146 AGCCAGCAATTGAGGAAGGTTATCATTTTT  
RECT\_147 GCGGAACATCTGAATAATGGAAGGTACAAAAT  
RECT\_148 CGCGCAGATTACCTTTTTTAATGGGAGAGACT  
RECT\_149 ACCTTTTTATTTAGTTAATTCATAGGGCTT  
RECT\_150 AATTGAGAATTCTGTCCAGACGACTAAACCAA  
RECT\_151 GTACCGCAATTCTAAGAACGCGAGTATTATTT  
RECT\_152 ATCCCAATGAGAATTAAGTGAACAGTTACCAG  
RECT\_153 AAGGAAACATAAAGGTGGCAACATTATCACCG  
RECT\_154 TCACCGACGCACCGTAATCAGTAGCAGAACCG  
RECT\_155 CCACCCTCTATTCACAAACAAATACCTGCCTA  
RECT\_156 TTTCCGGAAGTGCCGTCGAGAGGGTGAGTTTCG  
RECT\_157 ATCTTTAGGGCTGCAACAGTGCCAATACG  
RECT\_158 ACCTACCATAGTTTGAGTAACATTTAAAAT  
RECT\_159 TACATAAATCTTTGAATACCAAGTGTTAGA  
RECT\_160 GACCTAAATCAAAATCATAGGTCTAAACAG  
RECT\_161 AAACAACATGCCAACGCTCAACAGTCTTCT  
RECT\_162 TAGCGAACCTCCAAGAACGGGTATGACAAT  
RECT\_163 ACAAAGTCACAAAATAAACAGCCAGCGTTT  
RECT\_164 GAAACGCAAAGATAGCCGAACAAACCTGA  
RECT\_165 AATCAAGTTTCATTAAGGTGAATATAAAA  
RECT\_166 CATTAAAGCCAGAGCCGCCACCCTCGACAG  
RECT\_167 AAGTATAGCAAACAGTTAATGCCCAATCCT  
RECT\_168 AGGAACCCATGTACCGTAACACTTGATAT  
RECT\_169 TGGCACAGACAATATTTTTGAATGGGGTCAGTA  
RECT\_170 TTAACACCAGCACTAACAATAATCGTTATTA  
RECT\_171 ATTTTAAAATCAAAATTTTGCACGGATTTCG  
RECT\_172 CCTGATTGCAATATATGTGAGTGATCAATAGT  
RECT\_173 GAATTTATTTAATGGTTTAAAATATTCTTACC  
RECT\_174 AGTATAAAGTTCAGCTAATGCAGATGTCTTTC  
RECT\_175 CTTATCATTCCCGACTTGCGGGAGCCTAATTT  
RECT\_176 GCCAGTTAGAGGGTAATTGAGCGCTTTAAGAA  
RECT\_177 AAGTAAGCAGACACCACGGAATAATTTGACG  
RECT\_178 GAAATTATTGCCTTTAGCGTCAGACCGGAACC  
RECT\_179 GCCTCCCTCAGAATGAAAAGCGCAGTAACAGT  
RECT\_180 GCCCGTATCCGGAATAGGTGTATCAGCCCAAT  
RECT\_181 AGCCGTCAAAAAACAGAGGTGAGGCCTATTAG  
RECT\_182 CAGAAATAAAAATCCTTTGCCCGAAAAGATTAG  
RECT\_183 TGCTTCTGTTCCGGGAGAAAACAATAACGTA  
RECT\_184 TGTGATAAAAAGACGCTGAGAAGAGATAACCT  
RECT\_185 TGTTTTATCAATATGCGTTATACAAACCGACCG  
RECT\_186 AGCCTTAAACCAATCAATAATCGGCACGCGCC  
RECT\_187 AGAGAGATAGAGCGTCTTTCCAGAGGTTTTGA  
RECT\_188 TTGTCACAATCTTACCGAAGCCCTTTAATATC  
RECT\_189 GCGTTTTCAAGGGAGGGAAGGTAAAGTTTATT  
RECT\_190 AATTTACCGGAACCGAGCCACCCTGTAGC  
RECT\_191 TCAGGAGGTGGGGTCAGTGCCTTGAGTCTCTG

RECT\_192 CCACCCTCATTTTCAGGGATAGCAACCGTAC  
RECT\_193 TCTTTAATGCGCGAACTGATAGCCCCACCAG  
RECT\_194 CAGAAGATTAGATAATACATTTGTCGACAA  
RECT\_195 CTCGTATTAGAAATTGCGTAGATACAGTAC  
RECT\_196 CTTTACAAAATCGTCGCTATTAGCGATAG  
RECT\_197 CTTAGATTTAAGGCGTTAAATAAAGCCTGT  
RECT\_198 TTAGTATCACAATAGATAAGTCCACGAGCA  
RECT\_199 TGTAGAAATCAAGATTAGTTGCTCTTACCA  
RECT\_200 ACGCTAACACCCACAAGAATTGAAAATAGC  
RECT\_201 AATAGCTATCAATAGAAAATTCAACATTCA  
RECT\_202 ACCGATTGTCGGCATTTCGGTCATAATCA  
RECT\_203 AAATCACCTTCCAGTAAGCGTCAGTAATAA  
RECT\_204 GTTTTAACTTAGTACCGCCACCCAGAGCCA  
RECT\_205 AAAAATACCGAACGAACTAAAACATCGCCATT  
RECT\_206 AGACTTTACAAAATAGGATTTAGAAGTATT  
RECT\_207 AGATGAATATACAGTATTTTCAGGTTAACGTC  
RECT\_208 AATCCTTGAAAACATAATTAATTTCCCTTAG  
RECT\_209 CATAATTACTAGAAAAGAATAAACACCGGAAT  
RECT\_210 TATCCCATCTAATTTTGAACAAGAAAATAA  
RECT\_211 CAATTTTATCCTGAATATTTTGCACCCAGCTA  
RECT\_212 AGAGCAAGAAAACAATGGTTAAGCCCAATAATA  
RECT\_213 CAAAGACAAAAGGGCGTATGGTTTACCAGCGC  
RECT\_214 CGTTTGCCATCTTTTCATAGCCCCCTTATTAG  
RECT\_215 ATACAGGAGTGTACTGTACATGGCTTTTGATG  
RECT\_216 CAGAACCGCCACCCTCTCAGAACCGCCACCCT

DNA sequences for determining an efficient strategy for masking HhaI sites involving site sequence mutation (Supplementary Figure 9).

| Oligo name | Staple sequence (5' - mutation - 3')         |
|------------|----------------------------------------------|
| WtCG (B54) | CGGCGGATTGAATTCAGGCT <b>GC</b> GCAACGGGGGATG |
| MutTA      | CGGCGGATTGAATTCAGGCT <b>GTACA</b> ACGGGGGATG |
| MutAT      | CGGCGGATTGAATTCAGGCT <b>GATCA</b> ACGGGGGATG |
| Compl_B54  | CATCCCCGTTGCGCAGCCTGAATTCATCCGCCG            |

DNA sequences of staples modified for preparing triangle variants with masked HhaI restriction sites (Figs 3 and 4, Supplementary Figs 11 and 15).

| Site # | Oligo name | Sequence of staples with mutated site (5' - 3') |
|--------|------------|-------------------------------------------------|
| 1      | B45_Mut    | TAGAGCTTGACGGGGAGTTGCAGCAAGCGGTCATTGGGAT        |
| 2      | B52_Mut    | CGATCGGGCCTGTGTGAAATTGTTGGCGATTA                |
| 3      | B62_Mut    | GATCTCACAAGCCTGGGGTGCCTA                        |
| 4      | B54_Mut    | CGGCGGATTGAATTCAGGCTGATCAACGGGGGATG             |
| 5      | B51_Mut    | AGTTGGGTCAAAGATCCATTCGCCCCGTAATG                |
| 6      | B43_Mut    | ACGTTGTATTCCGGCACCGCTTCTGGATCATC                |
| 7      | L3_Mut     | GGCATCAAATTTGGGGATCGAGCTGAGTTAAA                |
| 8      | L56_Mut8   | ACCAAGCGCAGGATCATAGGCTGGAGAAGCTGGCTCATTAT       |
| 9      | L36_Mut    | GGATCAGACTCCATGTTACTTAGCCGTTTTAA                |
| 10     | L56_Mut10  | ACCAAGATCAGGCGCATAGGCTGGAGAAGCTGGCTCATTAT       |
| 8,10   | L56_Mut    | ACCAAGATCAGGATCATAGGCTGGAGAAGCTGGCTCATTAT       |
| 11     | L47_Mut    | GTTTTGTCAGGAATTGCGAATAATCCGACAA                 |
| 11     | L51_Mut    | ATAGTTGAAATTTTTTCAGGTTGATCATAGTT                |
| 12     | R06_Mut    | CCGGAACCCAGAATGGAAAGATCAACATGGCT                |

|        |           |                                           |
|--------|-----------|-------------------------------------------|
| 13     | R11_Mut   | CACCGGAAAGATCGTTTTATCGGAAGGGCGA           |
| 14     | R8_Mut    | GACGGGAGAATTAAGTTCGGAATAAGTTTATTTCCAGATCT |
| 15     | R20_Mut   | CCTTGAGTCAGACGATTGGCCTTGATCCACCC          |
| 16     | R37_Mut   | AGAGAATAACATAAAAAACAGGGAAGATCATTAA        |
| 17     | R53_Mut   | TCCAATCCAATAAGATTACCGATCCAATAAATAATAT     |
| 18     | R61_Mut   | GATCCTGTTATTCTAAGAACGCGATTCCAGAGCCTAATTT  |
| 19     | B17_Mut   | GATCAGAGGCGAATTAATTATTAGCACGTAAATTCTGAAT  |
| 20     | B27_Mut   | ATCGAACTAAAACAGAGGTGAGGCTTAGAAGTATT       |
| 22, 23 | Loop3_Mut | CCACACCCGCCGATCTTAATGATCCGCTACAGG         |
| 24     | Loop2_Mut | GTAGCGGTCACGCTGATCGTAACCA                 |
| 24     | Loop2_Wt  | GTAGCGGTCACGCTGATCGTAACCA                 |
| 25, 26 | Loop1_Mut | AAGCGAAAGGAGCGGGATCTAGGGATCTGGCAAGT       |

DNA sequences modified for studying the effect of a DNA nick near or overlapping the HhaI restriction site on its reactivity (Supporting Figure 16).

| Oligo name                                                       | Sequence (5' - 3')                     |
|------------------------------------------------------------------|----------------------------------------|
| dsDNA_Cmpl                                                       |                                        |
| AGGTAATTGAAATGAATAATTCGCCTCTGCGCGATTTTGTAACTTGGTATTCAAAGCAATCAGG |                                        |
| dsDNA                                                            |                                        |
| CCTGATTGCTTTGAATACCAAGTTACAAAATCGCGCAGAGGCGAATTATTCATTTCAATTACCT |                                        |
| I-a                                                              | CCTGATTGCTTTGAATACCAAGTTACAAAA         |
| I-b                                                              | TCGCGCAGAGGCGAATTATTCATTTCAATTACCT     |
| II-a                                                             | CCTGATTGCTTTGAATACCAAGTTACAAAAT        |
| II-b                                                             | CGCGCAGAGGCGAATTATTCATTTCAATTACCT      |
| III-a                                                            | CCTGATTGCTTTGAATACCAAGTTACAAAATC       |
| III-b                                                            | GCGCAGAGGCGAATTATTCATTTCAATTACCT       |
| IV-a                                                             | CCTGATTGCTTTGAATACCAAGTTACAAAATCG      |
| IV-b                                                             | CGCAGAGGCGAATTATTCATTTCAATTACCT        |
| V-a                                                              | CCTGATTGCTTTGAATACCAAGTTACAAAATCGC     |
| V-b                                                              | GCAGAGGCGAATTATTCATTTCAATTACCT         |
| VI-a                                                             | CCTGATTGCTTTGAATACCAAGTTACAAAATCGCG    |
| VI-b                                                             | CAGAGGCGAATTATTCATTTCAATTACCT          |
| VII-a                                                            | CCTGATTGCTTTGAATACCAAGTTACAAAATCGCGC   |
| VII-b                                                            | AGAGGCGAATTATTCATTTCAATTACCT           |
| VIII-a                                                           | CCTGATTGCTTTGAATACCAAGTTACAAAATCGCGCA  |
| VIII-b                                                           | GAGGCGAATTATTCATTTCAATTACCT            |
| IX-a                                                             | CCTGATTGCTTTGAATACCAAGTTACAAAATCGCGCAG |
| IX-b                                                             | AGGCGAATTATTCATTTCAATTACCT             |

DNA sequences modified for preparing triangle variants with masked Hin1II restriction sites (Supplementary Figure 20).

| Site | Oligo name | Sequence (5' - 3')                          |
|------|------------|---------------------------------------------|
| 1    | B48_MUTHIN | GGTTTTCCCGGTCATAGCTGTTTGAGAGGCG             |
| 2    | B35_MUTHIN | CTCTAGAGCAAGCTTGCCGGCCTGGTCAGTT             |
| 3    | L33_MUTHIN | AGGGATAGCTCAGAGCCACCACCCCGGTCAA             |
| 4A   | L25_MUTHIN | TAAAGCTAGGTAACAGTTGATTTCCATTTTTG            |
| 4B   | L27_MUTHIN | TAATTGCTTGAAGTTTTCATTTCCCAATCGGTTGTA        |
| 5    | L31_MUTHIN | AAAGAAGTTTTGCCAGCATAAATATTCATTGACTCAACCGGTT |
| 6    | L36_MUTHIN | GGCGCAGACTCCCGGTTACTTAGCCGTTTTAA            |
| 7    | L58_MUTHIN | GACCCCAAGACTTTTTCCGGAGGAGCTTGCTT            |
| 8    | L42_MUTHIN | AGACGTTACCCGGTACCGTAACACCCCTCAGAACC GCCAC   |

|    |                      |                                             |
|----|----------------------|---------------------------------------------|
| 9  | R09_MUTHIN           | GATAAGTGCCGTCGAGCTGAAACCGGAAAGTATACAGGAG    |
| 10 | R06_MUTHIN           | CCGGAACCCAGAATGGAAAGCGCAACCGGGCT            |
| 11 | R28_MUTHIN           | ATAAGAGCAAGAAACCGGGCATGATTAAGACTCCGACTTG    |
| 12 | R49_MUTHIN           | AGCCGGTATTTTCATCGTAGGAATCAAACGATTTTTTGT     |
| 13 | R63_MUTHIN           | ACGCTAACGAGCGTCTGGCGTTTTAGCGAACCCAACCGGT    |
| 14 | R52_MUTHIN           | CCCATCCTCGCCAACCGGTAATTTAATAAGGC            |
|    | B37_SHIFT            | CGAGAAAGGAAGGGAACGCTGCGCGTAACCAC            |
|    | B8_SHIFT             | CACACCCGCCGCGCTTCTGAAATGGATTATTTAATAAAAAG   |
|    | B12_SHIFT            | AGAGATAGATTACCGCTCAATCGTAATGCGCCGCTACAGG    |
|    | B16_SHIFT            | GCGCGTACTATGGTTGTAATATCCAGAACAATAACCCTTC    |
|    | B20_SHIFT            | GAATACGTCTATCGGCCTTGCTGGCTTTGACGAGCACGTA    |
|    | B23_SHIFT            | TAACGTGCTTTCCTCGAGTAGAAGAACTCAAAGGCACAGA    |
|    | B26_SHIFT            | CTATTAGTTAACATCACTTGCCTGTTGGAATCAGAGCGGG    |
|    | B28_SHIFT            | AGCTAAACAGGAGGCCCTTCTTTGATTAGTAACTTTAATG    |
|    | B30_SHIFT            | CTAAAACATAACCGTTGTAGCAATAGATTAAGGGATTTTA    |
|    | B31_SHIFT            | GACAGGAACGGTACGCGTCCATCACGCAAATTCGCCATTAATA |
|    | B32_SHIFT            | CCGAGTAAAAGAGTCTCAGAATCTTGAGAAGTGTTTTATAAT  |
|    | LINKER-R4B_SHIFT     | TCAAGATTAGTCAGTGAGGCCA                      |
| 15 | LOOP COMPL_S15_SHIFT | AACAGGAAAAACGCTCATGGAAATACCTAC              |

## Bibliography

1. Woo, S. and Rothemund, P.W.K. (2011) Programmable molecular recognition based on the geometry of DNA nanostructures. *Nat. Chem.*, **3**, 620–7.
2. Douglas, S.M., Marblestone, A.H., Teerapittayanon, S., Vazquez, A., Church, G.M. and Shih, W.M. (2009) Rapid prototyping of 3D DNA-origami shapes with caDNAno. *Nucleic Acids Res.*, **37**, 5001–5006.
3. Pan, K., Boulais, E., Yang, L. and Bathe, M. (2014) Structure-based model for light-harvesting properties of nucleic acid nanostructures. *Nucleic Acids Res.*, **42**, 2159–70.
4. Pettersen, E.F., Goddard, T.D., Huang, C.C., Couch, G.S., Greenblatt, D.M., Meng, E.C. and Ferrin, T.E. (2004) UCSF Chimera A visualization system for exploratory research and analysis. *J. Comput. Chem.*, **25**, 1605–1612.

## Acknowledgments

Double-helical models of DNA nanostructure elements surrounding restriction endonuclease sites were graphically manipulated with the UCSF Chimera package. Chimera is developed by the Resource for Biocomputing, Visualization, and Informatics at the University of California, San Francisco (supported by NIGMS P41-GM103311).
